# Supplementary material for: Biomedical generative pre-trained based transformer language model for age-related disease target discovery
Source: Aging (Albany NY). 2023 Sep 22;15(18):9293–309. doi: 10.18632/aging.205055 (PMC10564439; doi:10.18632/aging.205055)
Supplement: Supplementary Table 1 [file aging-15-205055-s001.xlsx]

## Sheet: Aging_genes
Supplementary Table 1. Top 200 aging-related genes identified by the established BioGPT-G-based approach.
Aging-related genes by BioGPT-G.
APOE
APP
BRCA1
SOD1
TNF
MIP
DHFR
CD4
VHL
CD44
CFTR
NGF
LDLR
GFAP
BRCA2
C3
ATM
EGF
FMR1
CCR5
GAL
KRAS
APC
CAD
CDK4
HMGN1
TBP
PTEN
LPA
CD68
MYC
CRP
CYP3A4
ACE
CD40
CD34
INKA1
PTH
TTR
LCAT
EGFR
SIRT1
CYP2E1
CETP
TREX1
GSTM1
BRAF
LMNA
XIAP
A3GALT2
CD5
BCL2
NLRP3
INKA2
ALK
ABCA1
BDNF
TP53
PI3
TRIM5
E2F1
PCSK9
HRAS
RAD51
PCNA
XDH
APC2
BCR
SOD2
SPARC
GAPDH
CD2
SET
RPE
DKK1
SRC
HGSNAT
ADA
HTT
MDM2
DRD2
ASPM
FOXO3B
IGF1
ATR
ABO
TERT
LONP1
CR1
PML
MUC1
NF1
S100B
NF2
AR
C5
GPI
BRD4
TAT
A1BG
BACH1
LRRK2
OTC
GDNF
AHI1
SKI
CD80
PARP1
MAG
APOL1
SBF2
HMGN2
RAD52
RAG1
SBDS
HGF
ACE2
ARC
JAK3
RET
NADK
TWIST1
CAT
CCR4
XPC
DAP
CCK
GC
FUS
DMD
HMGA1
WT1
NHLH1
CCR2
MET
NPY
LIG4
SBF1
DDT
C9
DBP
PAH
XPA
IDH1
CXCR4
LTBP2
AREG
TH
LPL
HMGB1
AHR
ABCB1
FH
WRN
HP1BP3
MAPT
CD36
HR
PC
LBP
APOB
CYP2D6
MGMT
DLX3
FOXO3
POMC
AHRR
SPR
ESR1
MUS81
CDK2
DMPK
L1CAM
LAT
HMOX1
ANG
CLC
SIRT6
HPSE
PMS1
AXL
AGT
TSC2
GSTP1
BAX
VIP
S100A4
TCF4
AHSP
DFFA
CD86
GHRH
FLI1
GRP
CD28
GAP43
C2
CYP1A1
MITF
IL2
