# Supplementary material for: Biomedical generative pre-trained based transformer language model for age-related disease target discovery
Source: Aging (Albany NY). 2023 Sep 22;15(18):9293–309. doi: 10.18632/aging.205055 (PMC10564439; doi:10.18632/aging.205055)
Supplement: Supplementary Table 2 [file aging-15-205055-s002.xlsx]

## Sheet: Supplementary_Table2
Supplementary Table 2. Significantly enriched pathways based on gene set enrichment analysis of top 50 aging-related genes.
ONTOLOGY	ID	Description	GeneRatio	BgRatio	pvalue	p.adjust	qvalue	geneID	Count
BP	GO:0008202	steroid metabolic process	1950-12-01	323/18800	3.65231e-11	1.04018e-07	4.83643e-08	APOE/APP/SOD1/TNF/CFTR/LDLR/GAL/CYP3A4/LCAT/SIRT1/CYP2E1/CETP	12
BP	GO:0006066	alcohol metabolic process	1950-12-01	361/18800	1.31994e-10	1.87959e-07	8.73937e-08	APOE/APP/SOD1/DHFR/CFTR/LDLR/PTEN/CYP3A4/PTH/TTR/LCAT/CETP	12
BP	GO:0007346	regulation of mitotic cell cycle	13/50	478/18800	2.37555e-10	2.25519e-07	1.04858e-07	APP/BRCA1/TNF/BRCA2/ATM/EGF/APC/CDK4/PTEN/MYC/EGFR/SIRT1/TREX1	13
BP	GO:0097305	response to alcohol	1950-10-01	235/18800	5.09946e-10	3.63082e-07	1.68819e-07	BRCA1/SOD1/TNF/CFTR/CCR5/CDK4/MYC/ACE/PTH/CYP2E1	10
BP	GO:0046890	regulation of lipid biosynthetic process	1950-09-01	175/18800	7.70505e-10	4.3888e-07	2.04062e-07	APOE/BRCA1/SOD1/TNF/LDLR/C3/CDK4/SIRT1/TREX1	9
BP	GO:0010876	lipid localization	1950-12-01	446/18800	1.47198e-09	6.987e-07	3.24869e-07	APOE/TNF/CFTR/LDLR/C3/GAL/LPA/CRP/ACE/LCAT/SIRT1/CETP	12
BP	GO:0008203	cholesterol metabolic process	1950-08-01	139/18800	3.01282e-09	1.22579e-06	5.69944e-07	APOE/APP/SOD1/CFTR/LDLR/CYP3A4/LCAT/CETP	8
BP	GO:0043410	positive regulation of MAPK cascade	1950-12-01	491/18800	4.34205e-09	1.54577e-06	7.18724e-07	APOE/APP/SOD1/TNF/CD4/CD44/EGF/PTEN/CD40/EGFR/BRAF/XIAP	12
BP	GO:1902652	secondary alcohol metabolic process	1950-08-01	149/18800	5.22115e-09	1.6522e-06	7.68211e-07	APOE/APP/SOD1/CFTR/LDLR/CYP3A4/LCAT/CETP	8
BP	GO:0016125	sterol metabolic process	1950-08-01	154/18800	6.77407e-09	1.92926e-06	8.9703e-07	APOE/APP/SOD1/CFTR/LDLR/CYP3A4/LCAT/CETP	8
BP	GO:0070371	ERK1 and ERK2 cascade	1950-10-01	335/18800	1.54111e-08	3.77816e-06	1.7567e-06	APOE/APP/TNF/CD4/CD44/EGF/PTEN/MYC/EGFR/BRAF	10
BP	GO:0009314	response to radiation	1950-11-01	438/18800	1.59682e-08	3.77816e-06	1.7567e-06	APP/BRCA1/TNF/BRCA2/ATM/FMR1/KRAS/MYC/EGFR/SIRT1/TREX1	11
BP	GO:0019216	regulation of lipid metabolic process	1950-10-01	339/18800	1.72458e-08	3.77816e-06	1.7567e-06	APOE/BRCA1/SOD1/TNF/LDLR/C3/GAL/CDK4/SIRT1/TREX1	10
BP	GO:0062012	regulation of small molecule metabolic process	1950-10-01	342/18800	1.87462e-08	3.81351e-06	1.77313e-06	APOE/APP/BRCA1/SOD1/TNF/LDLR/MYC/PTH/SIRT1/TREX1	10
BP	GO:0021782	glial cell development	1950-07-01	115/18800	2.14213e-08	4.06718e-06	1.89108e-06	APP/SOD1/TNF/LDLR/GFAP/KRAS/PTEN	7
BP	GO:0070997	neuron death	1950-10-01	353/18800	2.52848e-08	4.50069e-06	2.09265e-06	APOE/APP/SOD1/TNF/NGF/ATM/KRAS/CD34/SIRT1/XIAP	10
BP	GO:0001666	response to hypoxia	1950-09-01	286/18800	5.58465e-08	9.12019e-06	4.24054e-06	TNF/VHL/ATM/PTEN/MYC/ACE/CD34/SIRT1/LMNA	9
BP	GO:0010827	regulation of glucose transmembrane transport	1950-06-01	78/18800	5.76417e-08	9.12019e-06	4.24054e-06	TNF/C3/MYC/ACE/PTH/BRAF	6
BP	GO:0050727	regulation of inflammatory response	1950-10-01	394/18800	7.09649e-08	1.06373e-05	4.94592e-06	APOE/APP/SOD1/TNF/LDLR/C3/ATM/ACE/TREX1/XIAP	10
BP	GO:0036293	response to decreased oxygen levels	1950-09-01	299/18800	8.16549e-08	1.16277e-05	5.40642e-06	TNF/VHL/ATM/PTEN/MYC/ACE/CD34/SIRT1/LMNA	9
BP	GO:0014002	astrocyte development	1950-05-01	43/18800	9.66489e-08	1.2928e-05	6.01103e-06	APP/TNF/LDLR/GFAP/KRAS	5
BP	GO:0033135	regulation of peptidyl-serine phosphorylation	1950-07-01	144/18800	1.01332e-07	1.2928e-05	6.01103e-06	APP/TNF/CD44/NGF/PTEN/EGFR/BRAF	7
BP	GO:0009410	response to xenobiotic stimulus	1950-10-01	411/18800	1.05221e-07	1.2928e-05	6.01103e-06	SOD1/TNF/GAL/CDK4/MYC/CYP3A4/ACE/PTH/CYP2E1/GSTM1	10
BP	GO:0070374	positive regulation of ERK1 and ERK2 cascade	1950-08-01	220/18800	1.08944e-07	1.2928e-05	6.01103e-06	APOE/APP/TNF/CD4/CD44/PTEN/EGFR/BRAF	8
BP	GO:0071214	cellular response to abiotic stimulus	1950-09-01	323/18800	1.57422e-07	1.70457e-05	7.92558e-06	BRCA1/BRCA2/ATM/FMR1/PTEN/MYC/CD40/SIRT1/TREX1	9
BP	GO:0104004	cellular response to environmental stimulus	1950-09-01	323/18800	1.57422e-07	1.70457e-05	7.92558e-06	BRCA1/BRCA2/ATM/FMR1/PTEN/MYC/CD40/SIRT1/TREX1	9
BP	GO:0070482	response to oxygen levels	1950-09-01	324/18800	1.61599e-07	1.70457e-05	7.92558e-06	TNF/VHL/ATM/PTEN/MYC/ACE/CD34/SIRT1/LMNA	9
BP	GO:0051402	neuron apoptotic process	1950-08-01	241/18800	2.19107e-07	2.22863e-05	1.03623e-05	APOE/APP/SOD1/TNF/NGF/ATM/KRAS/XIAP	8
BP	GO:1901617	organic hydroxy compound biosynthetic process	1950-08-01	243/18800	2.33377e-07	2.26599e-05	1.0536e-05	APOE/SOD1/TNF/DHFR/CFTR/CYP3A4/PTH/SIRT1	8
BP	GO:0031331	positive regulation of cellular catabolic process	1950-10-01	449/18800	2.38693e-07	2.26599e-05	1.0536e-05	APOE/APP/TNF/LDLR/ATM/EGF/FMR1/PTEN/MYC/SIRT1	10
BP	GO:0008630	intrinsic apoptotic signaling pathway in response to DNA damage	1950-06-01	101/18800	2.71567e-07	2.49491e-05	1.16004e-05	BRCA1/TNF/CD44/BRCA2/ATM/SIRT1	6
BP	GO:0006641	triglyceride metabolic process	1950-06-01	103/18800	3.05158e-07	2.71591e-05	1.26279e-05	APOE/LDLR/C3/SIRT1/CYP2E1/CETP	6
BP	GO:0019218	regulation of steroid metabolic process	1950-06-01	104/18800	3.23191e-07	2.74144e-05	1.27466e-05	APOE/SOD1/TNF/LDLR/GAL/SIRT1	6
BP	GO:0051099	positive regulation of binding	1950-07-01	171/18800	3.27279e-07	2.74144e-05	1.27466e-05	APOE/APP/NGF/EGF/FMR1/MYC/ACE	7
BP	GO:0033138	positive regulation of peptidyl-serine phosphorylation	1950-06-01	107/18800	3.82617e-07	3.11341e-05	1.44762e-05	APP/TNF/CD44/NGF/EGFR/BRAF	6
BP	GO:0050730	regulation of peptidyl-tyrosine phosphorylation	1950-08-01	261/18800	4.02e-07	3.18026e-05	1.4787e-05	APP/TNF/CD4/CD44/EGF/ACE/CD40/EGFR	8
BP	GO:0051054	positive regulation of DNA metabolic process	1950-08-01	263/18800	4.25963e-07	3.27877e-05	1.5245e-05	BRCA1/TNF/ATM/EGF/MYC/CD40/EGFR/SIRT1	8
BP	GO:1904659	glucose transmembrane transport	1950-06-01	113/18800	5.28495e-07	3.96093e-05	1.84168e-05	TNF/C3/MYC/ACE/PTH/BRAF	6
BP	GO:0071478	cellular response to radiation	1950-07-01	187/18800	5.99175e-07	4.37551e-05	2.03445e-05	BRCA1/BRCA2/ATM/FMR1/MYC/SIRT1/TREX1	7
BP	GO:0008645	hexose transmembrane transport	1950-06-01	117/18800	6.48979e-07	4.62073e-05	2.14846e-05	TNF/C3/MYC/ACE/PTH/BRAF	6
BP	GO:0015749	monosaccharide transmembrane transport	1950-06-01	119/18800	7.17162e-07	4.98165e-05	2.31628e-05	TNF/C3/MYC/ACE/PTH/BRAF	6
BP	GO:0042176	regulation of protein catabolic process	1950-09-01	395/18800	8.52181e-07	5.76401e-05	2.68004e-05	APOE/TNF/LDLR/GFAP/EGF/FMR1/APC/PTEN/EGFR	9
BP	GO:0046486	glycerolipid metabolic process	1950-09-01	396/18800	8.70269e-07	5.76401e-05	2.68004e-05	APOE/LDLR/C3/ATM/PTEN/LCAT/SIRT1/CYP2E1/CETP	9
BP	GO:0042063	gliogenesis	1950-08-01	291/18800	9.14278e-07	5.91787e-05	2.75158e-05	APP/SOD1/TNF/LDLR/GFAP/KRAS/PTEN/MYC	8
BP	GO:0097193	intrinsic apoptotic signaling pathway	1950-08-01	295/18800	1.013e-06	6.41119e-05	2.98096e-05	BRCA1/SOD1/TNF/CD44/BRCA2/ATM/MYC/SIRT1	8
BP	GO:0000302	response to reactive oxygen species	1950-07-01	203/18800	1.04017e-06	6.44e-05	2.99435e-05	APOE/SOD1/DHFR/EGFR/SIRT1/CYP2E1/TREX1	7
BP	GO:2001022	positive regulation of response to DNA damage stimulus	1950-06-01	129/18800	1.15218e-06	6.98172e-05	3.24623e-05	BRCA1/ATM/FMR1/MYC/EGFR/SIRT1	6
BP	GO:0006639	acylglycerol metabolic process	1950-06-01	131/18800	1.26083e-06	7.32827e-05	3.40737e-05	APOE/LDLR/C3/SIRT1/CYP2E1/CETP	6
BP	GO:0034219	carbohydrate transmembrane transport	1950-06-01	131/18800	1.26083e-06	7.32827e-05	3.40737e-05	TNF/C3/MYC/ACE/PTH/BRAF	6
BP	GO:0006638	neutral lipid metabolic process	1950-06-01	132/18800	1.31822e-06	7.44258e-05	3.46051e-05	APOE/LDLR/C3/SIRT1/CYP2E1/CETP	6
BP	GO:0050890	cognition	1950-08-01	306/18800	1.33277e-06	7.44258e-05	3.46051e-05	APOE/APP/TNF/NGF/LDLR/KRAS/PTEN/EGFR	8
BP	GO:0009416	response to light stimulus	1950-08-01	310/18800	1.46866e-06	8.04372e-05	3.74002e-05	APP/BRCA2/FMR1/KRAS/MYC/EGFR/SIRT1/TREX1	8
BP	GO:0070372	regulation of ERK1 and ERK2 cascade	1950-08-01	311/18800	1.50442e-06	8.08412e-05	3.75881e-05	APOE/APP/TNF/CD4/CD44/PTEN/EGFR/BRAF	8
BP	GO:1901214	regulation of neuron death	1950-08-01	313/18800	1.57818e-06	8.22249e-05	3.82314e-05	APOE/SOD1/TNF/NGF/ATM/KRAS/CD34/SIRT1	8
BP	GO:0052548	regulation of endopeptidase activity	1950-09-01	426/18800	1.59226e-06	8.22249e-05	3.82314e-05	APP/TNF/CD44/NGF/C3/LPA/MYC/SIRT1/XIAP	9
BP	GO:0071479	cellular response to ionizing radiation	1950-05-01	75/18800	1.6257e-06	8.22249e-05	3.82314e-05	BRCA1/BRCA2/ATM/SIRT1/TREX1	5
BP	GO:0018105	peptidyl-serine phosphorylation	1950-08-01	315/18800	1.655e-06	8.22249e-05	3.82314e-05	APP/TNF/CD44/NGF/ATM/PTEN/EGFR/BRAF	8
BP	GO:0010001	glial cell differentiation	1950-07-01	218/18800	1.67452e-06	8.22249e-05	3.82314e-05	APP/SOD1/TNF/LDLR/GFAP/KRAS/PTEN	7
BP	GO:0006979	response to oxidative stress	1950-09-01	433/18800	1.82086e-06	8.44764e-05	3.92783e-05	APOE/APP/SOD1/TNF/DHFR/EGFR/SIRT1/CYP2E1/TREX1	9
BP	GO:0048608	reproductive structure development	1950-09-01	433/18800	1.82086e-06	8.44764e-05	3.92783e-05	SOD1/BRCA2/C3/ATM/PTEN/MYC/ACE/EGFR/SIRT1	9
BP	GO:0071241	cellular response to inorganic substance	1950-07-01	221/18800	1.83401e-06	8.44764e-05	3.92783e-05	APP/SOD1/FMR1/EGFR/TREX1/BRAF/A3GALT2	7
BP	GO:0045913	positive regulation of carbohydrate metabolic process	1950-05-01	77/18800	1.85362e-06	8.44764e-05	3.92783e-05	APP/EGF/MYC/PTH/SIRT1	5
BP	GO:1901990	regulation of mitotic cell cycle phase transition	1950-08-01	321/18800	1.90489e-06	8.44764e-05	3.92783e-05	APP/BRCA1/ATM/APC/CDK4/PTEN/EGFR/TREX1	8
BP	GO:0061458	reproductive system development	1950-09-01	436/18800	1.92719e-06	8.44764e-05	3.92783e-05	SOD1/BRCA2/C3/ATM/PTEN/MYC/ACE/EGFR/SIRT1	9
BP	GO:0010212	response to ionizing radiation	1950-06-01	142/18800	2.01892e-06	8.44764e-05	3.92783e-05	BRCA1/BRCA2/ATM/MYC/SIRT1/TREX1	6
BP	GO:0000082	G1/S transition of mitotic cell cycle	1950-07-01	225/18800	2.06629e-06	8.44764e-05	3.92783e-05	ATM/APC/CDK4/PTEN/MYC/EGFR/TREX1	7
BP	GO:0044772	mitotic cell cycle phase transition	1950-09-01	440/18800	2.07729e-06	8.44764e-05	3.92783e-05	APP/BRCA1/ATM/APC/CDK4/PTEN/MYC/EGFR/TREX1	9
BP	GO:0046165	alcohol biosynthetic process	1950-06-01	143/18800	2.10311e-06	8.44764e-05	3.92783e-05	APOE/SOD1/DHFR/CFTR/CYP3A4/PTH	6
BP	GO:0071456	cellular response to hypoxia	1950-06-01	143/18800	2.10311e-06	8.44764e-05	3.92783e-05	VHL/PTEN/MYC/CD34/SIRT1/LMNA	6
BP	GO:0030301	cholesterol transport	1950-05-01	79/18800	2.10598e-06	8.44764e-05	3.92783e-05	APOE/CFTR/LDLR/LCAT/CETP	5
BP	GO:0048708	astrocyte differentiation	1950-05-01	79/18800	2.10598e-06	8.44764e-05	3.92783e-05	APP/TNF/LDLR/GFAP/KRAS	5
BP	GO:0050673	epithelial cell proliferation	1950-09-01	443/18800	2.19639e-06	8.68794e-05	4.03956e-05	APOE/TNF/BRCA2/EGF/PTEN/MYC/CD34/EGFR/SIRT1	9
BP	GO:0009411	response to UV	1950-06-01	146/18800	2.37304e-06	9.2581e-05	4.30466e-05	BRCA2/FMR1/MYC/EGFR/SIRT1/TREX1	6
BP	GO:0062197	cellular response to chemical stress	1950-08-01	332/18800	2.44706e-06	9.41788e-05	4.37895e-05	SOD1/TNF/DHFR/ATM/MYC/EGFR/SIRT1/TREX1	8
BP	GO:0045732	positive regulation of protein catabolic process	1950-07-01	233/18800	2.60519e-06	9.89277e-05	4.59976e-05	APOE/TNF/LDLR/EGF/FMR1/APC/PTEN	7
BP	GO:0052547	regulation of peptidase activity	1950-09-01	456/18800	2.78323e-06	0.000103363	4.80598e-05	APP/TNF/CD44/NGF/C3/LPA/MYC/SIRT1/XIAP	9
BP	GO:0018209	peptidyl-serine modification	1950-08-01	338/18800	2.79458e-06	0.000103363	4.80598e-05	APP/TNF/CD44/NGF/ATM/PTEN/EGFR/BRAF	8
BP	GO:0051574	positive regulation of histone H3-K9 methylation	1950-03-01	11/18800	2.87718e-06	0.000104019	4.83649e-05	BRCA1/SIRT1/LMNA	3
BP	GO:0036294	cellular response to decreased oxygen levels	1950-06-01	151/18800	2.88536e-06	0.000104019	4.83649e-05	VHL/PTEN/MYC/CD34/SIRT1/LMNA	6
BP	GO:0019915	lipid storage	1950-05-01	86/18800	3.20915e-06	0.000114246	5.31198e-05	APOE/TNF/C3/CRP/SIRT1	5
BP	GO:1905952	regulation of lipid localization	1950-06-01	155/18800	3.35721e-06	0.000118041	5.48846e-05	APOE/TNF/C3/GAL/CRP/CETP	6
BP	GO:0097242	amyloid-beta clearance	1950-04-01	39/18800	3.39925e-06	0.000118062	5.48942e-05	APOE/TNF/LDLR/C3	4
BP	GO:0008643	carbohydrate transport	1950-06-01	156/18800	3.48449e-06	0.000119564	5.55928e-05	TNF/C3/MYC/ACE/PTH/BRAF	6
BP	GO:0051052	regulation of DNA metabolic process	1950-09-01	472/18800	3.68718e-06	0.00012496	5.81015e-05	BRCA1/TNF/BRCA2/ATM/EGF/MYC/CD40/EGFR/SIRT1	9
BP	GO:2001020	regulation of response to DNA damage stimulus	1950-07-01	246/18800	3.72949e-06	0.00012496	5.81015e-05	BRCA1/CD44/ATM/FMR1/MYC/EGFR/SIRT1	7
BP	GO:0034370	triglyceride-rich lipoprotein particle remodeling	1950-03-01	12/18800	3.82905e-06	0.000125346	5.82813e-05	APOE/LCAT/CETP	3
BP	GO:0034372	very-low-density lipoprotein particle remodeling	1950-03-01	12/18800	3.82905e-06	0.000125346	5.82813e-05	APOE/LCAT/CETP	3
BP	GO:0001819	positive regulation of cytokine production	1950-09-01	475/18800	3.8822e-06	0.000125642	5.84188e-05	APP/BRCA1/SOD1/TNF/CD4/C3/CD40/CD34/SIRT1	9
BP	GO:0015850	organic hydroxy compound transport	1950-07-01	248/18800	3.9339e-06	0.000125885	5.85316e-05	APOE/CFTR/LDLR/GAL/MYC/LCAT/CETP	7
BP	GO:0050806	positive regulation of synaptic transmission	1950-06-01	161/18800	4.18129e-06	0.000131813	6.12879e-05	APOE/APP/TNF/GFAP/FMR1/PTEN	6
BP	GO:0097306	cellular response to alcohol	1950-05-01	91/18800	4.24272e-06	0.000131813	6.12879e-05	BRCA1/CFTR/CDK4/MYC/ACE	5
BP	GO:0010951	negative regulation of endopeptidase activity	1950-07-01	251/18800	4.258e-06	0.000131813	6.12879e-05	APP/TNF/CD44/NGF/C3/LPA/XIAP	7
BP	GO:0050999	regulation of nitric-oxide synthase activity	1950-04-01	42/18800	4.59874e-06	0.00014083	6.54807e-05	APOE/TNF/DHFR/EGFR	4
BP	GO:0044843	cell cycle G1/S phase transition	1950-07-01	255/18800	4.72452e-06	0.000143143	6.65559e-05	ATM/APC/CDK4/PTEN/MYC/EGFR/TREX1	7
BP	GO:0015918	sterol transport	1950-05-01	94/18800	4.97797e-06	0.000146438	6.80883e-05	APOE/CFTR/LDLR/LCAT/CETP	5
BP	GO:1901655	cellular response to ketone	1950-05-01	94/18800	4.97797e-06	0.000146438	6.80883e-05	CFTR/CDK4/MYC/ACE/SIRT1	5
BP	GO:0071453	cellular response to oxygen levels	1950-06-01	166/18800	4.98755e-06	0.000146438	6.80883e-05	VHL/PTEN/MYC/CD34/SIRT1/LMNA	6
BP	GO:0045862	positive regulation of proteolysis	1950-08-01	369/18800	5.33691e-06	0.000155097	7.21143e-05	APOE/APP/TNF/EGF/FMR1/PTEN/MYC/SIRT1	8
BP	GO:2001233	regulation of apoptotic signaling pathway	1950-08-01	370/18800	5.44394e-06	0.000156609	7.28174e-05	BRCA1/SOD1/TNF/CD44/PTEN/MYC/SIRT1/LMNA	8
BP	GO:0010466	negative regulation of peptidase activity	1950-07-01	262/18800	5.64344e-06	0.000159698	7.42535e-05	APP/TNF/CD44/NGF/C3/LPA/XIAP	7
BP	GO:0071900	regulation of protein serine/threonine kinase activity	1950-08-01	372/18800	5.66345e-06	0.000159698	7.42535e-05	APOE/TNF/EGF/APC/PTEN/CD40/EGFR/SIRT1	8
BP	GO:0018108	peptidyl-tyrosine phosphorylation	1950-08-01	373/18800	5.776e-06	0.000161275	7.49867e-05	APP/TNF/CD4/CD44/EGF/ACE/CD40/EGFR	8
BP	GO:0007611	learning or memory	1950-07-01	264/18800	5.93176e-06	0.000164016	7.62612e-05	APOE/APP/NGF/LDLR/KRAS/PTEN/EGFR	7
BP	GO:0042632	cholesterol homeostasis	1950-05-01	98/18800	6.10977e-06	0.000166136	7.72466e-05	APOE/LDLR/LCAT/SIRT1/CETP	5
BP	GO:0018212	peptidyl-tyrosine modification	1950-08-01	376/18800	6.12508e-06	0.000166136	7.72466e-05	APP/TNF/CD4/CD44/EGF/ACE/CD40/EGFR	8
BP	GO:0055092	sterol homeostasis	1950-05-01	99/18800	6.42193e-06	0.000172544	8.02263e-05	APOE/LDLR/LCAT/SIRT1/CETP	5
BP	GO:0042770	signal transduction in response to DNA damage	1950-06-01	174/18800	6.53726e-06	0.000174001	8.09038e-05	BRCA1/CD44/BRCA2/ATM/SIRT1/TREX1	6
BP	GO:0006694	steroid biosynthetic process	1950-06-01	175/18800	6.75576e-06	0.000178152	8.28338e-05	APOE/SOD1/TNF/CFTR/CYP3A4/SIRT1	6
BP	GO:0050678	regulation of epithelial cell proliferation	1950-08-01	382/18800	6.87715e-06	0.000179689	8.35486e-05	APOE/TNF/BRCA2/EGF/PTEN/MYC/EGFR/SIRT1	8
BP	GO:0001774	microglial cell activation	1950-04-01	47/18800	7.25693e-06	0.000187889	8.7361e-05	APP/TNF/LDLR/ATM	4
BP	GO:0031058	positive regulation of histone modification	1950-05-01	103/18800	7.7977e-06	0.000200071	9.30252e-05	BRCA1/ATM/FMR1/SIRT1/LMNA	5
BP	GO:0006869	lipid transport	1950-08-01	391/18800	8.15124e-06	0.000207274	9.63746e-05	APOE/CFTR/LDLR/GAL/LPA/ACE/LCAT/CETP	8
BP	GO:0008585	female gonad development	1950-05-01	105/18800	8.56686e-06	0.000214021	9.95116e-05	SOD1/BRCA2/ATM/MYC/SIRT1	5
BP	GO:0045833	negative regulation of lipid metabolic process	1950-05-01	105/18800	8.56686e-06	0.000214021	9.95116e-05	APOE/BRCA1/SOD1/TNF/SIRT1	5
BP	GO:0006109	regulation of carbohydrate metabolic process	1950-06-01	183/18800	8.72633e-06	0.000216109	0.000100483	APP/EGF/MYC/PTH/SIRT1/TREX1	6
BP	GO:0042116	macrophage activation	1950-05-01	106/18800	8.97305e-06	0.000220304	0.000102433	APP/TNF/LDLR/ATM/TREX1	5
BP	GO:0002269	leukocyte activation involved in inflammatory response	1950-04-01	50/18800	9.31512e-06	0.000226747	0.000105429	APP/TNF/LDLR/ATM	4
BP	GO:0034375	high-density lipoprotein particle remodeling	1950-03-01	16/18800	9.67384e-06	0.000229592	0.000106752	APOE/LCAT/CETP	3
BP	GO:0042159	lipoprotein catabolic process	1950-03-01	16/18800	9.67384e-06	0.000229592	0.000106752	APOE/LDLR/ATM	3
BP	GO:1905906	regulation of amyloid fibril formation	1950-03-01	16/18800	9.67384e-06	0.000229592	0.000106752	APOE/APP/LDLR	3
BP	GO:0044403	biological process involved in symbiotic interaction	1950-07-01	286/18800	1e-05	0.000235373	0.000109439	APOE/CD4/LDLR/FMR1/CCR5/CRP/EGFR	7
BP	GO:0031099	regeneration	1950-06-01	188/18800	1.01783e-05	0.000237604	0.000110477	TNF/DHFR/GFAP/PTEN/MYC/ACE	6
BP	GO:0046545	development of primary female sexual characteristics	1950-05-01	109/18800	1.02826e-05	0.000238089	0.000110702	SOD1/BRCA2/ATM/MYC/SIRT1	5
BP	GO:0050731	positive regulation of peptidyl-tyrosine phosphorylation	1950-06-01	190/18800	1.08112e-05	0.000248309	0.000115454	TNF/CD4/CD44/EGF/ACE/CD40	6
BP	GO:0010874	regulation of cholesterol efflux	1950-04-01	52/18800	1.09075e-05	0.000248516	0.00011555	APOE/EGF/SIRT1/CETP	4
BP	GO:0014066	regulation of phosphatidylinositol 3-kinase signaling	1950-05-01	111/18800	1.12355e-05	0.000253958	0.000118081	TNF/EGF/PTEN/EGFR/SIRT1	5
BP	GO:0046325	negative regulation of glucose import	1950-03-01	17/18800	1.17248e-05	0.000258854	0.000120357	TNF/MYC/ACE	3
BP	GO:0060252	positive regulation of glial cell proliferation	1950-03-01	17/18800	1.17248e-05	0.000258854	0.000120357	TNF/GFAP/MYC	3
BP	GO:1900034	regulation of cellular response to heat	1950-03-01	17/18800	1.17248e-05	0.000258854	0.000120357	ATM/CD34/SIRT1	3
BP	GO:0021700	developmental maturation	1950-07-01	296/18800	1.2498e-05	0.00027314	0.000127	APP/CFTR/BRCA2/C3/GAL/PTEN/PTH	7
BP	GO:1901987	regulation of cell cycle phase transition	1950-08-01	415/18800	1.25637e-05	0.00027314	0.000127	APP/BRCA1/ATM/APC/CDK4/PTEN/EGFR/TREX1	8
BP	GO:0061900	glial cell activation	1950-04-01	54/18800	1.26919e-05	0.000273838	0.000127324	APP/TNF/LDLR/ATM	4
BP	GO:0016032	viral process	1950-08-01	418/18800	1.32356e-05	0.00028342	0.000131779	APOE/TNF/CD4/LDLR/FMR1/CCR5/CRP/EGFR	8
BP	GO:0002821	positive regulation of adaptive immune response	1950-05-01	115/18800	1.33475e-05	0.000283685	0.000131902	TNF/CD4/C3/CD40/SIRT1	5
BP	GO:0010883	regulation of lipid storage	1950-04-01	55/18800	1.36606e-05	0.00028627	0.000133104	TNF/C3/CRP/SIRT1	4
BP	GO:0048167	regulation of synaptic plasticity	1950-06-01	198/18800	1.36702e-05	0.00028627	0.000133104	APOE/APP/GFAP/FMR1/KRAS/PTEN	6
BP	GO:0010332	response to gamma radiation	1950-04-01	56/18800	1.46827e-05	0.000305229	0.00014192	BRCA2/ATM/MYC/TREX1	4
BP	GO:0045471	response to ethanol	1950-05-01	119/18800	1.57574e-05	0.00032291	0.000150141	SOD1/TNF/MYC/PTH/CYP2E1	5
BP	GO:0032768	regulation of monooxygenase activity	1950-04-01	57/18800	1.576e-05	0.00032291	0.000150141	APOE/TNF/DHFR/EGFR	4
BP	GO:0050804	modulation of chemical synaptic transmission	1950-08-01	429/18800	1.59648e-05	0.000324769	0.000151005	APOE/APP/TNF/NGF/GFAP/FMR1/KRAS/PTEN	8
BP	GO:0099177	regulation of trans-synaptic signaling	1950-08-01	430/18800	1.62348e-05	0.000327921	0.00015247	APOE/APP/TNF/NGF/GFAP/FMR1/KRAS/PTEN	8
BP	GO:0048732	gland development	1950-08-01	431/18800	1.65087e-05	0.000331105	0.000153951	SOD1/TNF/BRCA2/ATM/EGF/PTEN/MYC/EGFR	8
BP	GO:0043523	regulation of neuron apoptotic process	1950-06-01	207/18800	1.75876e-05	0.000350276	0.000162865	APOE/SOD1/TNF/NGF/ATM/KRAS	6
BP	GO:0097237	cellular response to toxic substance	1950-05-01	123/18800	1.84939e-05	0.00036475	0.000169595	APOE/SOD1/TNF/DHFR/GSTM1	5
BP	GO:1901215	negative regulation of neuron death	1950-06-01	209/18800	1.85705e-05	0.00036475	0.000169595	APOE/SOD1/NGF/KRAS/CD34/SIRT1	6
BP	GO:0046394	carboxylic acid biosynthetic process	1950-07-01	316/18800	1.90594e-05	0.000371114	0.000172554	BRCA1/DHFR/CAD/CYP3A4/SIRT1/CYP2E1/GSTM1	7
BP	GO:0046660	female sex differentiation	1950-05-01	124/18800	1.92326e-05	0.000371114	0.000172554	SOD1/BRCA2/ATM/MYC/SIRT1	5
BP	GO:0046324	regulation of glucose import	1950-04-01	60/18800	1.93417e-05	0.000371114	0.000172554	TNF/MYC/ACE/PTH	4
BP	GO:0019058	viral life cycle	1950-07-01	317/18800	1.94506e-05	0.000371114	0.000172554	APOE/TNF/CD4/LDLR/FMR1/CCR5/EGFR	7
BP	GO:0043691	reverse cholesterol transport	1950-03-01	20/18800	1.9546e-05	0.000371114	0.000172554	APOE/LCAT/CETP	3
BP	GO:0016053	organic acid biosynthetic process	1950-07-01	318/18800	1.98484e-05	0.00037436	0.000174063	BRCA1/DHFR/CAD/CYP3A4/SIRT1/CYP2E1/GSTM1	7
BP	GO:0051055	negative regulation of lipid biosynthetic process	1950-04-01	61/18800	2.06586e-05	0.000387076	0.000179976	APOE/BRCA1/SOD1/SIRT1	4
BP	GO:0031667	response to nutrient levels	1950-08-01	446/18800	2.11088e-05	0.000392928	0.000182696	APOE/SOD1/TNF/LDLR/CD68/ACE/PTH/SIRT1	8
BP	GO:0030258	lipid modification	1950-06-01	216/18800	2.23659e-05	0.000410956	0.000191079	APOE/PTEN/CYP3A4/LCAT/CYP2E1/A3GALT2	6
BP	GO:0043491	protein kinase B signaling	1950-06-01	216/18800	2.23659e-05	0.000410956	0.000191079	TNF/EGF/PTEN/CD40/EGFR/SIRT1	6
BP	GO:0045787	positive regulation of cell cycle	1950-07-01	329/18800	2.46869e-05	0.000450694	0.000209555	APP/TNF/BRCA2/EGF/CDK4/MYC/EGFR	7
BP	GO:0051235	maintenance of location	1950-07-01	331/18800	2.56633e-05	0.000465535	0.000216456	APOE/TNF/CD4/C3/CCR5/CRP/SIRT1	7
BP	GO:0010829	negative regulation of glucose transmembrane transport	1950-03-01	22/18800	2.63055e-05	0.000471183	0.000219082	TNF/MYC/ACE	3
BP	GO:0051000	positive regulation of nitric-oxide synthase activity	1950-03-01	22/18800	2.63055e-05	0.000471183	0.000219082	APOE/TNF/DHFR	3
BP	GO:0043467	regulation of generation of precursor metabolites and energy	1950-05-01	134/18800	2.79557e-05	0.00049452	0.000229933	APP/TNF/MYC/PTH/TREX1	5
BP	GO:2001235	positive regulation of apoptotic signaling pathway	1950-05-01	134/18800	2.79557e-05	0.00049452	0.000229933	SOD1/TNF/PTEN/MYC/SIRT1	5
BP	GO:0008406	gonad development	1950-06-01	226/18800	2.88499e-05	0.000507188	0.000235823	SOD1/BRCA2/ATM/MYC/ACE/SIRT1	6
BP	GO:0045137	development of primary sexual characteristics	1950-06-01	231/18800	3.26163e-05	0.000569885	0.000264975	SOD1/BRCA2/ATM/MYC/ACE/SIRT1	6
BP	GO:0033344	cholesterol efflux	1950-04-01	69/18800	3.36917e-05	0.000585085	0.000272042	APOE/EGF/SIRT1/CETP	4
BP	GO:0048143	astrocyte activation	1950-03-01	24/18800	3.44436e-05	0.000594518	0.000276428	APP/TNF/LDLR	3
BP	GO:0045930	negative regulation of mitotic cell cycle	1950-06-01	234/18800	3.50596e-05	0.000598998	0.000278511	BRCA1/TNF/ATM/APC/PTEN/TREX1	6
BP	GO:0009991	response to extracellular stimulus	1950-08-01	479/18800	3.51238e-05	0.000598998	0.000278511	APOE/SOD1/TNF/LDLR/CD68/ACE/PTH/SIRT1	8
BP	GO:0035296	regulation of tube diameter	1950-05-01	141/18800	3.56965e-05	0.00060156	0.000279702	APOE/SOD1/TNF/CRP/ACE	5
BP	GO:0097746	blood vessel diameter maintenance	1950-05-01	141/18800	3.56965e-05	0.00060156	0.000279702	APOE/SOD1/TNF/CRP/ACE	5
BP	GO:0045861	negative regulation of proteolysis	1950-07-01	350/18800	3.66353e-05	0.00061375	0.00028537	APP/TNF/CD44/NGF/C3/LPA/XIAP	7
BP	GO:0035150	regulation of tube size	1950-05-01	142/18800	3.69256e-05	0.000614995	0.000285949	APOE/SOD1/TNF/CRP/ACE	5
BP	GO:0010038	response to metal ion	1950-07-01	351/18800	3.73057e-05	0.000617712	0.000287213	APP/SOD1/PTH/LCAT/EGFR/BRAF/A3GALT2	7
BP	GO:0051570	regulation of histone H3-K9 methylation	1950-03-01	25/18800	3.90672e-05	0.000643141	0.000299036	BRCA1/SIRT1/LMNA	3
BP	GO:0014065	phosphatidylinositol 3-kinase signaling	1950-05-01	144/18800	3.94822e-05	0.000645008	0.000299904	TNF/EGF/PTEN/EGFR/SIRT1	5
BP	GO:0030330	DNA damage response, signal transduction by p53 class mediator	1950-04-01	72/18800	3.986e-05	0.000645008	0.000299904	CD44/BRCA2/ATM/SIRT1	4
BP	GO:0050810	regulation of steroid biosynthetic process	1950-04-01	72/18800	3.986e-05	0.000645008	0.000299904	APOE/SOD1/TNF/SIRT1	4
BP	GO:0050729	positive regulation of inflammatory response	1950-05-01	145/18800	4.08108e-05	0.000656662	0.000305323	APP/TNF/LDLR/C3/ACE	5
BP	GO:0150076	neuroinflammatory response	1950-04-01	73/18800	4.20884e-05	0.000671012	0.000311995	APP/TNF/LDLR/ATM	4
BP	GO:0062013	positive regulation of small molecule metabolic process	1950-05-01	146/18800	4.21739e-05	0.000671012	0.000311995	APP/TNF/MYC/PTH/SIRT1	5
BP	GO:0034614	cellular response to reactive oxygen species	1950-05-01	147/18800	4.35719e-05	0.000685596	0.000318776	SOD1/DHFR/EGFR/SIRT1/TREX1	5
BP	GO:2000377	regulation of reactive oxygen species metabolic process	1950-05-01	147/18800	4.35719e-05	0.000685596	0.000318776	BRCA1/SOD1/TNF/DHFR/CRP	5
BP	GO:0050767	regulation of neurogenesis	1950-07-01	361/18800	4.45822e-05	0.000697639	0.000324375	TNF/NGF/LDLR/GFAP/PTEN/MYC/ACE	7
BP	GO:0071695	anatomical structure maturation	1950-06-01	246/18800	4.63477e-05	0.000721302	0.000335378	APP/CFTR/BRCA2/C3/GAL/PTH	6
BP	GO:0002437	inflammatory response to antigenic stimulus	1950-04-01	75/18800	4.68168e-05	0.000724642	0.000336931	TNF/C3/CD68/TREX1	4
BP	GO:0051098	regulation of binding	1950-07-01	366/18800	4.86359e-05	0.00074873	0.000348131	APOE/APP/NGF/EGF/FMR1/MYC/ACE	7
BP	GO:0061045	negative regulation of wound healing	1950-04-01	76/18800	4.93212e-05	0.000753844	0.000350508	APOE/TNF/PTEN/CD34	4
BP	GO:0033032	regulation of myeloid cell apoptotic process	1950-03-01	27/18800	4.94975e-05	0.000753844	0.000350508	CCR5/PTEN/SIRT1	3
BP	GO:0051346	negative regulation of hydrolase activity	1950-07-01	371/18800	5.29877e-05	0.000802707	0.000373228	APP/TNF/CD44/NGF/C3/LPA/XIAP	7
BP	GO:0046323	glucose import	1950-04-01	79/18800	5.74228e-05	0.000860737	0.00040021	TNF/MYC/ACE/PTH	4
BP	GO:0072332	intrinsic apoptotic signaling pathway by p53 class mediator	1950-04-01	79/18800	5.74228e-05	0.000860737	0.00040021	CD44/BRCA2/MYC/SIRT1	4
BP	GO:1903364	positive regulation of cellular protein catabolic process	1950-05-01	157/18800	5.96186e-05	0.000888973	0.000413338	APOE/LDLR/EGF/FMR1/PTEN	5
BP	GO:0042759	long-chain fatty acid biosynthetic process	1950-03-01	29/18800	6.16025e-05	0.000913771	0.000424868	CYP3A4/CYP2E1/GSTM1	3
BP	GO:2000045	regulation of G1/S transition of mitotic cell cycle	1950-05-01	160/18800	6.52253e-05	0.000962495	0.000447523	ATM/APC/PTEN/EGFR/TREX1	5
BP	GO:0034368	protein-lipid complex remodeling	1950-03-01	30/18800	6.83192e-05	0.00099272	0.000461576	APOE/LCAT/CETP	3
BP	GO:0034369	plasma lipoprotein particle remodeling	1950-03-01	30/18800	6.83192e-05	0.00099272	0.000461576	APOE/LCAT/CETP	3
BP	GO:0060251	regulation of glial cell proliferation	1950-03-01	30/18800	6.83192e-05	0.00099272	0.000461576	TNF/GFAP/MYC	3
BP	GO:0045786	negative regulation of cell cycle	1950-07-01	387/18800	6.9115e-05	0.000995122	0.000462693	BRCA1/TNF/ATM/APC/PTEN/SIRT1/TREX1	7
BP	GO:0006633	fatty acid biosynthetic process	1950-05-01	162/18800	6.91833e-05	0.000995122	0.000462693	BRCA1/CYP3A4/SIRT1/CYP2E1/GSTM1	5
BP	GO:0097006	regulation of plasma lipoprotein particle levels	1950-04-01	84/18800	7.3025e-05	0.0010451	0.000485932	APOE/LDLR/LCAT/CETP	4
BP	GO:0008625	extrinsic apoptotic signaling pathway via death domain receptors	1950-04-01	85/18800	7.64817e-05	0.0010891	0.000506389	BRCA1/TNF/NGF/PTEN	4
BP	GO:0006631	fatty acid metabolic process	1950-07-01	395/18800	7.85709e-05	0.00111328	0.000517634	BRCA1/C3/CYP3A4/SIRT1/CYP2E1/TREX1/GSTM1	7
BP	GO:0045860	positive regulation of protein kinase activity	1950-07-01	396/18800	7.98238e-05	0.00111764	0.000519661	TNF/CD4/EGF/ACE/CD40/EGFR/SIRT1	7
BP	GO:0051048	negative regulation of secretion	1950-05-01	167/18800	7.98913e-05	0.00111764	0.000519661	APOE/TNF/EGF/FMR1/ACE	5
BP	GO:2000134	negative regulation of G1/S transition of mitotic cell cycle	1950-04-01	86/18800	8.00559e-05	0.00111764	0.000519661	ATM/APC/PTEN/TREX1	4
BP	GO:0032770	positive regulation of monooxygenase activity	1950-03-01	32/18800	8.31518e-05	0.0011277	0.000524336	APOE/TNF/DHFR	3
BP	GO:0033028	myeloid cell apoptotic process	1950-03-01	32/18800	8.31518e-05	0.0011277	0.000524336	CCR5/PTEN/SIRT1	3
BP	GO:0034367	protein-containing complex remodeling	1950-03-01	32/18800	8.31518e-05	0.0011277	0.000524336	APOE/LCAT/CETP	3
BP	GO:0044788	modulation by host of viral process	1950-03-01	32/18800	8.31518e-05	0.0011277	0.000524336	APOE/FMR1/CRP	3
BP	GO:1901889	negative regulation of cell junction assembly	1950-03-01	32/18800	8.31518e-05	0.0011277	0.000524336	TNF/PTEN/ACE	3
BP	GO:1902253	regulation of intrinsic apoptotic signaling pathway by p53 class mediator	1950-03-01	32/18800	8.31518e-05	0.0011277	0.000524336	CD44/MYC/SIRT1	3
BP	GO:0072331	signal transduction by p53 class mediator	1950-05-01	170/18800	8.69026e-05	0.00117298	0.00054539	CD44/BRCA2/ATM/MYC/SIRT1	5
BP	GO:0034644	cellular response to UV	1950-04-01	88/18800	8.75672e-05	0.00117637	0.000546969	FMR1/MYC/SIRT1/TREX1	4
BP	GO:0055094	response to lipoprotein particle	1950-03-01	33/18800	9.12959e-05	0.00121784	0.000566249	APOE/LDLR/CD68	3
BP	GO:1903578	regulation of ATP metabolic process	1950-04-01	89/18800	9.15091e-05	0.00121784	0.000566249	APP/TNF/MYC/TREX1	4
BP	GO:0043542	endothelial cell migration	1950-06-01	279/18800	9.29862e-05	0.00123174	0.000572713	APOE/TNF/EGF/PTEN/CD40/SIRT1	6
BP	GO:0055088	lipid homeostasis	1950-05-01	173/18800	9.43786e-05	0.0012444	0.000578598	APOE/LDLR/LCAT/SIRT1/CETP	5
BP	GO:0007548	sex differentiation	1950-06-01	281/18800	9.67061e-05	0.00126921	0.000590135	SOD1/BRCA2/ATM/MYC/ACE/SIRT1	6
BP	GO:0090322	regulation of superoxide metabolic process	1950-03-01	34/18800	9.99437e-05	0.00129972	0.000604322	SOD1/DHFR/CRP	3
BP	GO:1990000	amyloid fibril formation	1950-03-01	34/18800	9.99437e-05	0.00129972	0.000604322	APOE/APP/LDLR	3
BP	GO:0031056	regulation of histone modification	1950-05-01	176/18800	0.00010234	0.001321	0.000614216	BRCA1/ATM/FMR1/SIRT1/LMNA	5
BP	GO:0034599	cellular response to oxidative stress	1950-06-01	284/18800	0.000102508	0.001321	0.000614216	SOD1/TNF/DHFR/EGFR/SIRT1/TREX1	6
BP	GO:1900407	regulation of cellular response to oxidative stress	1950-04-01	92/18800	0.00010411	0.00132961	0.00061822	SOD1/TNF/DHFR/SIRT1	4
BP	GO:1903035	negative regulation of response to wounding	1950-04-01	92/18800	0.00010411	0.00132961	0.00061822	APOE/TNF/PTEN/CD34	4
BP	GO:0048015	phosphatidylinositol-mediated signaling	1950-05-01	177/18800	0.000105106	0.00133634	0.000621348	TNF/EGF/PTEN/EGFR/SIRT1	5
BP	GO:1905954	positive regulation of lipid localization	1950-04-01	94/18800	0.000113181	0.00143262	0.000666112	APOE/C3/GAL/CETP	4
BP	GO:0010632	regulation of epithelial cell migration	1950-06-01	290/18800	0.000114942	0.00144847	0.000673483	APOE/TNF/EGF/PTEN/CD40/SIRT1	6
BP	GO:0048017	inositol lipid-mediated signaling	1950-05-01	181/18800	0.000116746	0.00146473	0.000681042	TNF/EGF/PTEN/EGFR/SIRT1	5
BP	GO:0043516	regulation of DNA damage response, signal transduction by p53 class mediator	1950-03-01	36/18800	0.000118805	0.00147754	0.000687001	CD44/ATM/SIRT1	3
BP	GO:0071402	cellular response to lipoprotein particle stimulus	1950-03-01	36/18800	0.000118805	0.00147754	0.000687001	APOE/LDLR/CD68	3
BP	GO:0043405	regulation of MAP kinase activity	1950-05-01	183/18800	0.000122925	0.00150205	0.000698395	APOE/TNF/EGF/CD40/EGFR	5
BP	GO:0045766	positive regulation of angiogenesis	1950-05-01	183/18800	0.000122925	0.00150205	0.000698395	BRCA1/C3/CD40/CD34/SIRT1	5
BP	GO:1901991	negative regulation of mitotic cell cycle phase transition	1950-05-01	183/18800	0.000122925	0.00150205	0.000698395	BRCA1/ATM/APC/PTEN/TREX1	5
BP	GO:1904018	positive regulation of vasculature development	1950-05-01	183/18800	0.000122925	0.00150205	0.000698395	BRCA1/C3/CD40/CD34/SIRT1	5
BP	GO:0002683	negative regulation of immune system process	1950-07-01	425/18800	0.00012394	0.00150205	0.000698395	TNF/LDLR/ATM/GAL/CD68/MYC/TREX1	7
BP	GO:0042391	regulation of membrane potential	1950-07-01	425/18800	0.00012394	0.00150205	0.000698395	APP/SOD1/TNF/CFTR/FMR1/PTEN/MYC	7
BP	GO:0010389	regulation of G2/M transition of mitotic cell cycle	1950-04-01	97/18800	0.000127845	0.00152984	0.000711317	APP/BRCA1/ATM/CDK4	4
BP	GO:0045807	positive regulation of endocytosis	1950-04-01	97/18800	0.000127845	0.00152984	0.000711317	APOE/C3/EGF/FMR1	4
BP	GO:1902807	negative regulation of cell cycle G1/S phase transition	1950-04-01	97/18800	0.000127845	0.00152984	0.000711317	ATM/APC/PTEN/TREX1	4
BP	GO:0090181	regulation of cholesterol metabolic process	1950-03-01	37/18800	0.000129046	0.00153776	0.000714998	APOE/SOD1/LDLR	3
BP	GO:0032102	negative regulation of response to external stimulus	1950-07-01	429/18800	0.000131339	0.00155856	0.000724669	APOE/SOD1/TNF/LDLR/PTEN/CD34/TREX1	7
BP	GO:0060291	long-term synaptic potentiation	1950-04-01	98/18800	0.000133025	0.00157201	0.000730926	APOE/APP/GFAP/PTEN	4
BP	GO:0051896	regulation of protein kinase B signaling	1950-05-01	187/18800	0.000136035	0.00160094	0.000744375	TNF/EGF/PTEN/EGFR/SIRT1	5
BP	GO:0031647	regulation of protein stability	1950-06-01	300/18800	0.000138308	0.001621	0.000753702	VHL/KRAS/PTEN/SIRT1/TREX1/LMNA	6
BP	GO:0002819	regulation of adaptive immune response	1950-05-01	188/18800	0.000139473	0.00162131	0.000753846	TNF/CD4/C3/CD40/SIRT1	5
BP	GO:1902806	regulation of cell cycle G1/S phase transition	1950-05-01	188/18800	0.000139473	0.00162131	0.000753846	ATM/APC/PTEN/EGFR/TREX1	5
BP	GO:0014013	regulation of gliogenesis	1950-04-01	100/18800	0.000143839	0.00166526	0.000774283	TNF/LDLR/GFAP/MYC	4
BP	GO:0019932	second-messenger-mediated signaling	1950-06-01	303/18800	0.000146008	0.00168297	0.000782515	APOE/TNF/CD4/CCR5/GAL/EGFR	6
BP	GO:1901654	response to ketone	1950-05-01	190/18800	0.000146551	0.00168297	0.000782515	CFTR/CDK4/MYC/ACE/SIRT1	5
BP	GO:1902882	regulation of response to oxidative stress	1950-04-01	101/18800	0.000149479	0.0017097	0.000794945	SOD1/TNF/DHFR/SIRT1	4
BP	GO:0071248	cellular response to metal ion	1950-05-01	191/18800	0.000150191	0.00171097	0.000795536	APP/SOD1/EGFR/BRAF/A3GALT2	5
BP	GO:0051567	histone H3-K9 methylation	1950-03-01	39/18800	0.000151216	0.00171579	0.000797776	BRCA1/SIRT1/LMNA	3
BP	GO:0051960	regulation of nervous system development	1950-07-01	440/18800	0.000153559	0.00173546	0.000806922	TNF/NGF/LDLR/GFAP/PTEN/MYC/ACE	7
BP	GO:0062014	negative regulation of small molecule metabolic process	1950-04-01	102/18800	0.000155277	0.00174794	0.000812723	APOE/BRCA1/SOD1/SIRT1	4
BP	GO:1901796	regulation of signal transduction by p53 class mediator	1950-04-01	103/18800	0.000161235	0.00179699	0.000835533	CD44/ATM/MYC/SIRT1	4
BP	GO:0001935	endothelial cell proliferation	1950-05-01	194/18800	0.000161528	0.00179699	0.000835533	APOE/TNF/EGF/CD34/SIRT1	5
BP	GO:0071897	DNA biosynthetic process	1950-05-01	194/18800	0.000161528	0.00179699	0.000835533	TNF/ATM/MYC/SIRT1/TREX1	5
BP	GO:0006909	phagocytosis	1950-06-01	310/18800	0.0001653	0.00183181	0.000851721	SOD1/TNF/LDLR/C3/CRP/TREX1	6
BP	GO:0060070	canonical Wnt signaling pathway	1950-06-01	313/18800	0.000174163	0.00191016	0.00088815	APOE/EGF/APC/PTEN/EGFR/XIAP	6
BP	GO:0002714	positive regulation of B cell mediated immunity	1950-03-01	41/18800	0.000175724	0.00191016	0.00088815	TNF/C3/CD40	3
BP	GO:0002891	positive regulation of immunoglobulin mediated immune response	1950-03-01	41/18800	0.000175724	0.00191016	0.00088815	TNF/C3/CD40	3
BP	GO:0046688	response to copper ion	1950-03-01	41/18800	0.000175724	0.00191016	0.00088815	APP/SOD1/LCAT	3
BP	GO:0150077	regulation of neuroinflammatory response	1950-03-01	41/18800	0.000175724	0.00191016	0.00088815	TNF/LDLR/ATM	3
BP	GO:0032872	regulation of stress-activated MAPK cascade	1950-05-01	198/18800	0.000177649	0.00192375	0.000894468	APP/TNF/MYC/EGFR/XIAP	5
BP	GO:0051341	regulation of oxidoreductase activity	1950-04-01	106/18800	0.000180104	0.00194294	0.000903393	APOE/TNF/DHFR/EGFR	4
BP	GO:0016055	Wnt signaling pathway	1950-07-01	452/18800	0.000181189	0.00194727	0.000905406	APOE/APP/EGF/APC/PTEN/EGFR/XIAP	7
BP	GO:0198738	cell-cell signaling by wnt	1950-07-01	454/18800	0.000186163	0.00199241	0.000926395	APOE/APP/EGF/APC/PTEN/EGFR/XIAP	7
BP	GO:0055090	acylglycerol homeostasis	1950-03-01	42/18800	0.000188887	0.00199241	0.000926395	APOE/SIRT1/CETP	3
BP	GO:0060964	regulation of miRNA-mediated gene silencing	1950-03-01	42/18800	0.000188887	0.00199241	0.000926395	TNF/FMR1/EGFR	3
BP	GO:0070328	triglyceride homeostasis	1950-03-01	42/18800	0.000188887	0.00199241	0.000926395	APOE/SIRT1/CETP	3
BP	GO:0090207	regulation of triglyceride metabolic process	1950-03-01	42/18800	0.000188887	0.00199241	0.000926395	APOE/LDLR/C3	3
BP	GO:0070302	regulation of stress-activated protein kinase signaling cascade	1950-05-01	201/18800	0.000190527	0.00200229	0.000930986	APP/TNF/MYC/EGFR/XIAP	5
BP	GO:1902749	regulation of cell cycle G2/M phase transition	1950-04-01	108/18800	0.000193538	0.00202645	0.000942223	APP/BRCA1/ATM/CDK4	4
BP	GO:0009408	response to heat	1950-04-01	109/18800	0.000200519	0.00209186	0.000972634	SOD1/ATM/CD34/SIRT1	4
BP	GO:0042771	intrinsic apoptotic signaling pathway in response to DNA damage by p53 class mediator	1950-03-01	43/18800	0.000202674	0.00210663	0.000979502	CD44/BRCA2/SIRT1	3
BP	GO:0043281	regulation of cysteine-type endopeptidase activity involved in apoptotic process	1950-05-01	204/18800	0.000204105	0.00211379	0.00098283	TNF/CD44/MYC/SIRT1/XIAP	5
BP	GO:0002824	positive regulation of adaptive immune response based on somatic recombination of immune receptors built from immunoglobulin superfamily domains	1950-04-01	110/18800	0.00020768	0.00214302	0.00099642	TNF/CD4/C3/CD40	4
BP	GO:0051051	negative regulation of transport	1950-07-01	464/18800	0.000212724	0.00218714	0.00101694	APOE/TNF/EGF/FMR1/PTEN/MYC/ACE	7
BP	GO:0007088	regulation of mitotic nuclear division	1950-04-01	111/18800	0.000215024	0.00219253	0.00101944	TNF/ATM/EGF/APC	4
BP	GO:0010828	positive regulation of glucose transmembrane transport	1950-03-01	44/18800	0.000217098	0.00219253	0.00101944	C3/PTH/BRAF	3
BP	GO:0014009	glial cell proliferation	1950-03-01	44/18800	0.000217098	0.00219253	0.00101944	TNF/GFAP/MYC	3
BP	GO:0060147	regulation of post-transcriptional gene silencing	1950-03-01	44/18800	0.000217098	0.00219253	0.00101944	TNF/FMR1/EGFR	3
BP	GO:1900368	regulation of post-transcriptional gene silencing by RNA	1950-03-01	44/18800	0.000217098	0.00219253	0.00101944	TNF/FMR1/EGFR	3
BP	GO:0009185	ribonucleoside diphosphate metabolic process	1950-04-01	112/18800	0.000222553	0.00223968	0.00104137	APP/CAD/MYC/TREX1	4
BP	GO:0071902	positive regulation of protein serine/threonine kinase activity	1950-05-01	208/18800	0.000223345	0.00223974	0.00104139	TNF/EGF/CD40/EGFR/SIRT1	5
BP	GO:0048638	regulation of developmental growth	1950-06-01	329/18800	0.000227995	0.00227835	0.00105935	APOE/APP/SOD1/NGF/CDK4/PTEN	6
BP	GO:0070661	leukocyte proliferation	1950-06-01	330/18800	0.000231751	0.0022959	0.00106751	ATM/GAL/CRP/ACE/CD40/PTH	6
BP	GO:0006110	regulation of glycolytic process	1950-03-01	45/18800	0.00023217	0.0022959	0.00106751	APP/MYC/TREX1	3
BP	GO:0071827	plasma lipoprotein particle organization	1950-03-01	45/18800	0.00023217	0.0022959	0.00106751	APOE/LCAT/CETP	3
BP	GO:0002573	myeloid leukocyte differentiation	1950-05-01	210/18800	0.000233469	0.00230076	0.00106976	APP/TNF/CD4/MYC/SIRT1	5
BP	GO:0050679	positive regulation of epithelial cell proliferation	1950-05-01	211/18800	0.00023866	0.0023438	0.00108978	TNF/EGF/MYC/EGFR/SIRT1	5
BP	GO:1990748	cellular detoxification	1950-04-01	115/18800	0.00024628	0.00241033	0.00112071	APOE/SOD1/DHFR/GSTM1	4
BP	GO:0060966	regulation of gene silencing by RNA	1950-03-01	46/18800	0.000247904	0.00241504	0.0011229	TNF/FMR1/EGFR	3
BP	GO:0033674	positive regulation of kinase activity	1950-07-01	476/18800	0.000248564	0.00241504	0.0011229	TNF/CD4/EGF/ACE/CD40/EGFR/SIRT1	7
BP	GO:0034764	positive regulation of transmembrane transport	1950-05-01	213/18800	0.000249305	0.00241504	0.0011229	CFTR/C3/GAL/PTH/BRAF	5
BP	GO:0019751	polyol metabolic process	1950-04-01	116/18800	0.000254579	0.00244838	0.0011384	DHFR/PTEN/CYP3A4/PTH	4
BP	GO:0043406	positive regulation of MAP kinase activity	1950-04-01	116/18800	0.000254579	0.00244838	0.0011384	TNF/EGF/CD40/EGFR	4
BP	GO:0030111	regulation of Wnt signaling pathway	1950-06-01	336/18800	0.000255326	0.00244838	0.0011384	APOE/APP/EGF/APC/EGFR/XIAP	6
BP	GO:0072330	monocarboxylic acid biosynthetic process	1950-05-01	215/18800	0.000260309	0.00248778	0.00115672	BRCA1/CYP3A4/SIRT1/CYP2E1/GSTM1	5
BP	GO:0016064	immunoglobulin mediated immune response	1950-05-01	216/18800	0.000265947	0.00253317	0.00117783	TNF/C3/CRP/CD40/TREX1	5
BP	GO:0042311	vasodilation	1950-03-01	48/18800	0.000281406	0.00265086	0.00123255	APOE/SOD1/TNF	3
BP	GO:0048146	positive regulation of fibroblast proliferation	1950-03-01	48/18800	0.000281406	0.00265086	0.00123255	CDK4/MYC/EGFR	3
BP	GO:0071825	protein-lipid complex subunit organization	1950-03-01	48/18800	0.000281406	0.00265086	0.00123255	APOE/LCAT/CETP	3
BP	GO:0019221	cytokine-mediated signaling pathway	1950-07-01	486/18800	0.000282026	0.00265086	0.00123255	TNF/CD4/CD44/CCR5/SIRT1/TREX1/XIAP	7
BP	GO:0019724	B cell mediated immunity	1950-05-01	219/18800	0.000283421	0.00265521	0.00123457	TNF/C3/CRP/CD40/TREX1	5
BP	GO:0090066	regulation of anatomical structure size	1950-07-01	487/18800	0.000285563	0.00266651	0.00123982	APOE/SOD1/TNF/NGF/PTEN/CRP/ACE	7
BP	GO:0045765	regulation of angiogenesis	1950-06-01	345/18800	0.000294192	0.0027381	0.00127311	BRCA1/TNF/C3/CD40/CD34/SIRT1	6
BP	GO:0097191	extrinsic apoptotic signaling pathway	1950-05-01	221/18800	0.000295547	0.00274175	0.00127481	BRCA1/TNF/NGF/PTEN/LMNA	5
BP	GO:0071482	cellular response to light stimulus	1950-04-01	121/18800	0.000299118	0.00275678	0.00128179	FMR1/MYC/SIRT1/TREX1	4
BP	GO:0030225	macrophage differentiation	1950-03-01	49/18800	0.000299198	0.00275678	0.00128179	APP/CD4/SIRT1	3
BP	GO:1901652	response to peptide	1950-07-01	491/18800	0.00030007	0.00275678	0.00128179	APP/TNF/GAL/APC/CDK4/MYC/SIRT1	7
BP	GO:0050769	positive regulation of neurogenesis	1950-05-01	222/18800	0.000301755	0.00276334	0.00128485	TNF/NGF/GFAP/MYC/ACE	5
BP	GO:0042368	vitamin D biosynthetic process	1950-02-01	10/18800	0.00030773	0.00279063	0.00129754	TNF/CYP3A4	2
BP	GO:0071838	cell proliferation in bone marrow	1950-02-01	10/18800	0.00030773	0.00279063	0.00129754	ACE/PTH	2
BP	GO:2000109	regulation of macrophage apoptotic process	1950-02-01	10/18800	0.00030773	0.00279063	0.00129754	CCR5/SIRT1	2
BP	GO:0071901	negative regulation of protein serine/threonine kinase activity	1950-04-01	122/18800	0.000308655	0.00279063	0.00129754	APOE/APC/PTEN/SIRT1	4
BP	GO:0031062	positive regulation of histone methylation	1950-03-01	50/18800	0.000317701	0.0028364	0.00131882	BRCA1/SIRT1/LMNA	3
BP	GO:0043457	regulation of cellular respiration	1950-03-01	50/18800	0.000317701	0.0028364	0.00131882	TNF/MYC/TREX1	3
BP	GO:0048168	regulation of neuronal synaptic plasticity	1950-03-01	50/18800	0.000317701	0.0028364	0.00131882	APOE/APP/KRAS	3
BP	GO:0061647	histone H3-K9 modification	1950-03-01	50/18800	0.000317701	0.0028364	0.00131882	BRCA1/SIRT1/LMNA	3
BP	GO:1901342	regulation of vasculature development	1950-06-01	351/18800	0.00032259	0.00287105	0.00133493	BRCA1/TNF/C3/CD40/CD34/SIRT1	6
BP	GO:0060284	regulation of cell development	1950-07-01	500/18800	0.000334891	0.00297124	0.00138151	TNF/NGF/LDLR/GFAP/PTEN/MYC/ACE	7
BP	GO:0071356	cellular response to tumor necrosis factor	1950-05-01	229/18800	0.000348035	0.00306874	0.00142685	BRCA1/TNF/CD40/SIRT1/XIAP	5
BP	GO:2000116	regulation of cysteine-type endopeptidase activity	1950-05-01	229/18800	0.000348035	0.00306874	0.00142685	TNF/CD44/MYC/SIRT1/XIAP	5
BP	GO:0010594	regulation of endothelial cell migration	1950-05-01	230/18800	0.000355061	0.00311143	0.00144669	APOE/TNF/EGF/CD40/SIRT1	5
BP	GO:2001234	negative regulation of apoptotic signaling pathway	1950-05-01	230/18800	0.000355061	0.00311143	0.00144669	BRCA1/TNF/CD44/SIRT1/LMNA	5
BP	GO:1902930	regulation of alcohol biosynthetic process	1950-03-01	52/18800	0.000356887	0.00311784	0.00144968	APOE/SOD1/PTH	3
BP	GO:0010631	epithelial cell migration	1950-06-01	358/18800	0.000358397	0.00312145	0.00145136	APOE/TNF/EGF/PTEN/CD40/SIRT1	6
BP	GO:0072593	reactive oxygen species metabolic process	1950-05-01	231/18800	0.000362195	0.00314491	0.00146226	BRCA1/SOD1/TNF/DHFR/CRP	5
BP	GO:0002274	myeloid leukocyte activation	1950-05-01	232/18800	0.000369437	0.00319771	0.00148681	APP/TNF/LDLR/ATM/TREX1	5
BP	GO:0045931	positive regulation of mitotic cell cycle	1950-04-01	128/18800	0.000370521	0.00319771	0.00148681	APP/BRCA2/CDK4/EGFR	4
BP	GO:0090132	epithelium migration	1950-06-01	361/18800	0.000374666	0.00320166	0.00148865	APOE/TNF/EGF/PTEN/CD40/SIRT1	6
BP	GO:1901653	cellular response to peptide	1950-06-01	361/18800	0.000374666	0.00320166	0.00148865	APP/TNF/APC/CDK4/MYC/SIRT1	6
BP	GO:0031642	negative regulation of myelination	1950-02-01	11/18800	0.000375475	0.00320166	0.00148865	TNF/PTEN	2
BP	GO:0071394	cellular response to testosterone stimulus	1950-02-01	11/18800	0.000375475	0.00320166	0.00148865	MYC/SIRT1	2
BP	GO:0048260	positive regulation of receptor-mediated endocytosis	1950-03-01	53/18800	0.000377594	0.00321011	0.00149258	C3/EGF/FMR1	3
BP	GO:0007093	mitotic cell cycle checkpoint signaling	1950-04-01	130/18800	0.000392981	0.0033211	0.00154418	BRCA1/ATM/APC/TREX1	4
BP	GO:0009132	nucleoside diphosphate metabolic process	1950-04-01	130/18800	0.000392981	0.0033211	0.00154418	APP/CAD/MYC/TREX1	4
BP	GO:0090130	tissue migration	1950-06-01	366/18800	0.000403064	0.00339623	0.00157912	APOE/TNF/EGF/PTEN/CD40/SIRT1	6
BP	GO:0043470	regulation of carbohydrate catabolic process	1950-03-01	55/18800	0.000421294	0.00352895	0.00164083	APP/MYC/TREX1	3
BP	GO:0060998	regulation of dendritic spine development	1950-03-01	55/18800	0.000421294	0.00352895	0.00164083	APOE/FMR1/PTEN	3
BP	GO:0002460	adaptive immune response based on somatic recombination of immune receptors built from immunoglobulin superfamily domains	1950-06-01	370/18800	0.000426975	0.00356606	0.00165808	TNF/CD4/C3/CRP/CD40/TREX1	6
BP	GO:0061041	regulation of wound healing	1950-04-01	133/18800	0.000428474	0.00356811	0.00165903	APOE/TNF/PTEN/CD34	4
BP	GO:0002863	positive regulation of inflammatory response to antigenic stimulus	1950-02-01	12/18800	0.000449805	0.00368116	0.0017116	TNF/C3	2
BP	GO:0051573	negative regulation of histone H3-K9 methylation	1950-02-01	12/18800	0.000449805	0.00368116	0.0017116	BRCA1/SIRT1	2
BP	GO:0051798	positive regulation of hair follicle development	1950-02-01	12/18800	0.000449805	0.00368116	0.0017116	TNF/GAL	2
BP	GO:0072711	cellular response to hydroxyurea	1950-02-01	12/18800	0.000449805	0.00368116	0.0017116	FMR1/TREX1	2
BP	GO:1900112	regulation of histone H3-K9 trimethylation	1950-02-01	12/18800	0.000449805	0.00368116	0.0017116	SIRT1/LMNA	2
BP	GO:1900272	negative regulation of long-term synaptic potentiation	1950-02-01	12/18800	0.000449805	0.00368116	0.0017116	APOE/APP	2
BP	GO:0001541	ovarian follicle development	1950-03-01	57/18800	0.000468118	0.00380914	0.0017711	SOD1/ATM/MYC	3
BP	GO:0043388	positive regulation of DNA binding	1950-03-01	57/18800	0.000468118	0.00380914	0.0017711	NGF/EGF/MYC	3
BP	GO:0051403	stress-activated MAPK cascade	1950-05-01	245/18800	0.000473916	0.00384534	0.00178793	APP/TNF/MYC/EGFR/XIAP	5
BP	GO:0006898	receptor-mediated endocytosis	1950-05-01	246/18800	0.000482787	0.00390618	0.00181623	APOE/LDLR/C3/EGF/FMR1	5
BP	GO:0009636	response to toxic substance	1950-05-01	247/18800	0.000491782	0.0039308	0.00182767	APOE/SOD1/TNF/DHFR/GSTM1	5
BP	GO:0090068	positive regulation of cell cycle process	1950-05-01	247/18800	0.000491782	0.0039308	0.00182767	APP/TNF/EGF/CDK4/EGFR	5
BP	GO:0031644	regulation of nervous system process	1950-04-01	138/18800	0.000492633	0.0039308	0.00182767	APP/TNF/FMR1/PTEN	4
BP	GO:0006695	cholesterol biosynthetic process	1950-03-01	58/18800	0.00049273	0.0039308	0.00182767	APOE/SOD1/CFTR	3
BP	GO:1902653	secondary alcohol biosynthetic process	1950-03-01	58/18800	0.00049273	0.0039308	0.00182767	APOE/SOD1/CFTR	3
BP	GO:0051783	regulation of nuclear division	1950-04-01	139/18800	0.000506242	0.00401609	0.00186733	TNF/ATM/EGF/APC	4
BP	GO:0055076	transition metal ion homeostasis	1950-04-01	139/18800	0.000506242	0.00401609	0.00186733	APP/SOD1/MYC/XIAP	4
BP	GO:0034612	response to tumor necrosis factor	1950-05-01	249/18800	0.000510152	0.00403587	0.00187652	BRCA1/TNF/CD40/SIRT1/XIAP	5
BP	GO:0031102	neuron projection regeneration	1950-03-01	59/18800	0.000518157	0.00405834	0.00188697	DHFR/GFAP/PTEN	3
BP	GO:0046686	response to cadmium ion	1950-03-01	59/18800	0.000518157	0.00405834	0.00188697	SOD1/PTH/EGFR	3
BP	GO:0051353	positive regulation of oxidoreductase activity	1950-03-01	59/18800	0.000518157	0.00405834	0.00188697	APOE/TNF/DHFR	3
BP	GO:0000086	G2/M transition of mitotic cell cycle	1950-04-01	140/18800	0.000520117	0.00405834	0.00188697	APP/BRCA1/ATM/CDK4	4
BP	GO:0042157	lipoprotein metabolic process	1950-04-01	140/18800	0.000520117	0.00405834	0.00188697	APOE/LDLR/ATM/LCAT	4
BP	GO:0010745	negative regulation of macrophage derived foam cell differentiation	1950-02-01	13/18800	0.000530684	0.00406287	0.00188908	CRP/CETP	2
BP	GO:0042362	fat-soluble vitamin biosynthetic process	1950-02-01	13/18800	0.000530684	0.00406287	0.00188908	TNF/CYP3A4	2
BP	GO:0070914	UV-damage excision repair	1950-02-01	13/18800	0.000530684	0.00406287	0.00188908	SIRT1/TREX1	2
BP	GO:0071287	cellular response to manganese ion	1950-02-01	13/18800	0.000530684	0.00406287	0.00188908	APP/A3GALT2	2
BP	GO:0071888	macrophage apoptotic process	1950-02-01	13/18800	0.000530684	0.00406287	0.00188908	CCR5/SIRT1	2
BP	GO:0072710	response to hydroxyurea	1950-02-01	13/18800	0.000530684	0.00406287	0.00188908	FMR1/TREX1	2
BP	GO:1905907	negative regulation of amyloid fibril formation	1950-02-01	13/18800	0.000530684	0.00406287	0.00188908	APOE/LDLR	2
BP	GO:0034763	negative regulation of transmembrane transport	1950-04-01	141/18800	0.000534261	0.00406838	0.00189164	TNF/FMR1/MYC/ACE	4
BP	GO:0046328	regulation of JNK cascade	1950-04-01	141/18800	0.000534261	0.00406838	0.00189164	APP/TNF/EGFR/XIAP	4
BP	GO:0031098	stress-activated protein kinase signaling cascade	1950-05-01	252/18800	0.000538671	0.00409103	0.00190217	APP/TNF/MYC/EGFR/XIAP	5
BP	GO:0045017	glycerolipid biosynthetic process	1950-05-01	253/18800	0.000548439	0.00415413	0.00193151	LDLR/C3/ATM/PTEN/LCAT	5
BP	GO:0070663	regulation of leukocyte proliferation	1950-05-01	254/18800	0.00055834	0.00421791	0.00196117	ATM/GAL/CRP/CD40/PTH	5
BP	GO:0035264	multicellular organism growth	1950-04-01	143/18800	0.000563366	0.00424462	0.00197359	APP/SOD1/ATM/CDK4	4
BP	GO:1901988	negative regulation of cell cycle phase transition	1950-05-01	255/18800	0.000568375	0.00427106	0.00198588	BRCA1/ATM/APC/PTEN/TREX1	5
BP	GO:0050994	regulation of lipid catabolic process	1950-03-01	61/18800	0.000571501	0.00427201	0.00198632	TNF/LDLR/CDK4	3
BP	GO:2001244	positive regulation of intrinsic apoptotic signaling pathway	1950-03-01	61/18800	0.000571501	0.00427201	0.00198632	SOD1/MYC/SIRT1	3
BP	GO:0043524	negative regulation of neuron apoptotic process	1950-04-01	145/18800	0.000593583	0.00442546	0.00205767	APOE/SOD1/NGF/KRAS	4
BP	GO:1903362	regulation of cellular protein catabolic process	1950-05-01	258/18800	0.000599296	0.0044343	0.00206178	APOE/LDLR/EGF/FMR1/PTEN	5
BP	GO:0002712	regulation of B cell mediated immunity	1950-03-01	62/18800	0.00059944	0.0044343	0.00206178	TNF/C3/CD40	3
BP	GO:0002889	regulation of immunoglobulin mediated immune response	1950-03-01	62/18800	0.00059944	0.0044343	0.00206178	TNF/C3/CD40	3
BP	GO:0046718	viral entry into host cell	1950-04-01	146/18800	0.000609116	0.0044882	0.00208684	CD4/LDLR/CCR5/EGFR	4
BP	GO:0032868	response to insulin	1950-05-01	259/18800	0.000609879	0.0044882	0.00208684	GAL/APC/CDK4/MYC/SIRT1	5
BP	GO:0016322	neuron remodeling	1950-02-01	14/18800	0.000618079	0.00451356	0.00209863	APP/C3	2
BP	GO:0090239	regulation of histone H4 acetylation	1950-02-01	14/18800	0.000618079	0.00451356	0.00209863	BRCA1/SIRT1	2
BP	GO:2001140	positive regulation of phospholipid transport	1950-02-01	14/18800	0.000618079	0.00451356	0.00209863	APOE/CETP	2
BP	GO:0061448	connective tissue development	1950-05-01	260/18800	0.000620601	0.00452039	0.00210181	CD44/CDK4/CD34/PTH/SIRT1	5
BP	GO:0010573	vascular endothelial growth factor production	1950-03-01	63/18800	0.000628237	0.00455272	0.00211684	BRCA1/TNF/C3	3
BP	GO:0046173	polyol biosynthetic process	1950-03-01	63/18800	0.000628237	0.00455272	0.00211684	DHFR/CYP3A4/PTH	3
BP	GO:0060828	regulation of canonical Wnt signaling pathway	1950-05-01	261/18800	0.000631465	0.0045645	0.00212232	APOE/EGF/APC/EGFR/XIAP	5
BP	GO:0003018	vascular process in circulatory system	1950-05-01	263/18800	0.000653621	0.00471269	0.00219122	APOE/SOD1/TNF/CRP/ACE	5
BP	GO:0014015	positive regulation of gliogenesis	1950-03-01	64/18800	0.000657904	0.00471968	0.00219447	TNF/GFAP/MYC	3
BP	GO:0040014	regulation of multicellular organism growth	1950-03-01	64/18800	0.000657904	0.00471968	0.00219447	APP/SOD1/CDK4	3
BP	GO:0043535	regulation of blood vessel endothelial cell migration	1950-04-01	150/18800	0.000674144	0.00481194	0.00223737	APOE/TNF/CD40/SIRT1	4
BP	GO:0098754	detoxification	1950-04-01	150/18800	0.000674144	0.00481194	0.00223737	APOE/SOD1/DHFR/GSTM1	4
BP	GO:0016126	sterol biosynthetic process	1950-03-01	65/18800	0.000688452	0.00488955	0.00227345	APOE/SOD1/CFTR	3
BP	GO:0031100	animal organ regeneration	1950-03-01	65/18800	0.000688452	0.00488955	0.00227345	TNF/MYC/ACE	3
BP	GO:0033127	regulation of histone phosphorylation	1950-02-01	15/18800	0.000711957	0.00496974	0.00231074	ATM/FMR1	2
BP	GO:0034116	positive regulation of heterotypic cell-cell adhesion	1950-02-01	15/18800	0.000711957	0.00496974	0.00231074	TNF/CD44	2
BP	GO:0034380	high-density lipoprotein particle assembly	1950-02-01	15/18800	0.000711957	0.00496974	0.00231074	APOE/LCAT	2
BP	GO:0034384	high-density lipoprotein particle clearance	1950-02-01	15/18800	0.000711957	0.00496974	0.00231074	APOE/LDLR	2
BP	GO:0043518	negative regulation of DNA damage response, signal transduction by p53 class mediator	1950-02-01	15/18800	0.000711957	0.00496974	0.00231074	CD44/SIRT1	2
BP	GO:1902166	negative regulation of intrinsic apoptotic signaling pathway in response to DNA damage by p53 class mediator	1950-02-01	15/18800	0.000711957	0.00496974	0.00231074	CD44/SIRT1	2
BP	GO:2001138	regulation of phospholipid transport	1950-02-01	15/18800	0.000711957	0.00496974	0.00231074	APOE/CETP	2
BP	GO:0034605	cellular response to heat	1950-03-01	66/18800	0.00071989	0.0050006	0.00232509	ATM/CD34/SIRT1	3
BP	GO:0050435	amyloid-beta metabolic process	1950-03-01	66/18800	0.00071989	0.0050006	0.00232509	APOE/TNF/ACE	3
BP	GO:0044409	entry into host	1950-04-01	153/18800	0.000726042	0.0050067	0.00232792	CD4/LDLR/CCR5/EGFR	4
BP	GO:0048754	branching morphogenesis of an epithelial tube	1950-04-01	153/18800	0.000726042	0.0050067	0.00232792	TNF/EGF/KRAS/MYC	4
BP	GO:2001236	regulation of extrinsic apoptotic signaling pathway	1950-04-01	153/18800	0.000726042	0.0050067	0.00232792	BRCA1/TNF/PTEN/LMNA	4
BP	GO:0051962	positive regulation of nervous system development	1950-05-01	270/18800	0.000735788	0.00506165	0.00235347	TNF/NGF/GFAP/MYC/ACE	5
BP	GO:0051851	modulation by host of symbiont process	1950-03-01	67/18800	0.000752229	0.00513752	0.00238875	APOE/FMR1/CRP	3
BP	GO:0071300	cellular response to retinoic acid	1950-03-01	67/18800	0.000752229	0.00513752	0.00238875	TNF/ATM/MYC	3
BP	GO:1901224	positive regulation of NIK/NF-kappaB signaling	1950-03-01	67/18800	0.000752229	0.00513752	0.00238875	APP/TNF/EGFR	3
BP	GO:0044839	cell cycle G2/M phase transition	1950-04-01	155/18800	0.000762174	0.00519299	0.00241454	APP/BRCA1/ATM/CDK4	4
BP	GO:0043627	response to estrogen	1950-03-01	68/18800	0.000785479	0.00533901	0.00248243	BRCA1/GAL/MYC	3
BP	GO:0034374	low-density lipoprotein particle remodeling	1950-02-01	16/18800	0.000812283	0.00546899	0.00254287	APOE/CETP	2
BP	GO:0035067	negative regulation of histone acetylation	1950-02-01	16/18800	0.000812283	0.00546899	0.00254287	BRCA1/SIRT1	2
BP	GO:0051044	positive regulation of membrane protein ectodomain proteolysis	1950-02-01	16/18800	0.000812283	0.00546899	0.00254287	APOE/TNF	2
BP	GO:1902931	negative regulation of alcohol biosynthetic process	1950-02-01	16/18800	0.000812283	0.00546899	0.00254287	APOE/SOD1	2
BP	GO:0007292	female gamete generation	1950-04-01	158/18800	0.000818733	0.00549263	0.00255386	BRCA2/ATM/MYC/SIRT1	4
BP	GO:0032370	positive regulation of lipid transport	1950-03-01	69/18800	0.000819652	0.00549263	0.00255386	APOE/GAL/CETP	3
BP	GO:0050766	positive regulation of phagocytosis	1950-03-01	71/18800	0.000890801	0.0059554	0.00276903	SOD1/TNF/C3	3
BP	GO:0036124	histone H3-K9 trimethylation	1950-02-01	17/18800	0.000919024	0.00609005	0.00283164	SIRT1/LMNA	2
BP	GO:0055089	fatty acid homeostasis	1950-02-01	17/18800	0.000919024	0.00609005	0.00283164	APOE/SIRT1	2
BP	GO:1902165	regulation of intrinsic apoptotic signaling pathway in response to DNA damage by p53 class mediator	1950-02-01	17/18800	0.000919024	0.00609005	0.00283164	CD44/SIRT1	2
BP	GO:0050680	negative regulation of epithelial cell proliferation	1950-04-01	163/18800	0.000919495	0.00609005	0.00283164	APOE/TNF/BRCA2/PTEN	4
BP	GO:0042060	wound healing	1950-06-01	429/18800	0.000926635	0.00610247	0.00283741	APOE/TNF/CD44/PTEN/CD40/CD34	6
BP	GO:0006801	superoxide metabolic process	1950-03-01	72/18800	0.000927799	0.00610247	0.00283741	SOD1/DHFR/CRP	3
BP	GO:0043966	histone H3 acetylation	1950-03-01	72/18800	0.000927799	0.00610247	0.00283741	BRCA1/BRCA2/SIRT1	3
BP	GO:0043967	histone H4 acetylation	1950-03-01	73/18800	0.000965758	0.00632294	0.00293992	BRCA1/BRCA2/SIRT1	3
BP	GO:2000573	positive regulation of DNA biosynthetic process	1950-03-01	73/18800	0.000965758	0.00632294	0.00293992	TNF/ATM/MYC	3
BP	GO:1903034	regulation of response to wounding	1950-04-01	166/18800	0.000983984	0.00642749	0.00298854	APOE/TNF/PTEN/CD34	4
BP	GO:0031349	positive regulation of defense response	1950-05-01	289/18800	0.000997895	0.0064979	0.00302127	APP/TNF/LDLR/C3/ACE	5
BP	GO:0002637	regulation of immunoglobulin production	1950-03-01	74/18800	0.00100469	0.0064979	0.00302127	TNF/CD40/TREX1	3
BP	GO:0046470	phosphatidylcholine metabolic process	1950-03-01	74/18800	0.00100469	0.0064979	0.00302127	LDLR/LCAT/CETP	3
BP	GO:0051298	centrosome duplication	1950-03-01	74/18800	0.00100469	0.0064979	0.00302127	BRCA1/BRCA2/SIRT1	3
BP	GO:0002700	regulation of production of molecular mediator of immune response	1950-04-01	167/18800	0.00100617	0.0064979	0.00302127	TNF/CD40/SIRT1/TREX1	4
BP	GO:0071466	cellular response to xenobiotic stimulus	1950-04-01	168/18800	0.00102871	0.00657618	0.00305767	MYC/CYP3A4/CYP2E1/GSTM1	4
BP	GO:0008340	determination of adult lifespan	1950-02-01	18/18800	0.00103215	0.00657618	0.00305767	ATM/TREX1	2
BP	GO:0034433	steroid esterification	1950-02-01	18/18800	0.00103215	0.00657618	0.00305767	APOE/LCAT	2
BP	GO:0034434	sterol esterification	1950-02-01	18/18800	0.00103215	0.00657618	0.00305767	APOE/LCAT	2
BP	GO:0034435	cholesterol esterification	1950-02-01	18/18800	0.00103215	0.00657618	0.00305767	APOE/LCAT	2
BP	GO:0043217	myelin maintenance	1950-02-01	18/18800	0.00103215	0.00657618	0.00305767	SOD1/PTEN	2
BP	GO:0000075	cell cycle checkpoint signaling	1950-04-01	170/18800	0.00107484	0.00681771	0.00316997	BRCA1/ATM/APC/TREX1	4
BP	GO:0048660	regulation of smooth muscle cell proliferation	1950-04-01	170/18800	0.00107484	0.00681771	0.00316997	APOE/TNF/PTEN/MYC	4
BP	GO:2001242	regulation of intrinsic apoptotic signaling pathway	1950-04-01	171/18800	0.00109845	0.00695195	0.00323239	SOD1/CD44/MYC/SIRT1	4
BP	GO:0010720	positive regulation of cell development	1950-05-01	297/18800	0.00112689	0.00708795	0.00329563	TNF/NGF/GFAP/MYC/ACE	5
BP	GO:0043154	negative regulation of cysteine-type endopeptidase activity involved in apoptotic process	1950-03-01	77/18800	0.0011274	0.00708795	0.00329563	TNF/CD44/XIAP	3
BP	GO:1903201	regulation of oxidative stress-induced cell death	1950-03-01	77/18800	0.0011274	0.00708795	0.00329563	SOD1/TNF/SIRT1	3
BP	GO:0002822	regulation of adaptive immune response based on somatic recombination of immune receptors built from immunoglobulin superfamily domains	1950-04-01	173/18800	0.00114675	0.00711455	0.00330799	TNF/CD4/C3/CD40	4
BP	GO:0007259	receptor signaling pathway via JAK-STAT	1950-04-01	173/18800	0.00114675	0.00711455	0.00330799	TNF/VHL/EGF/CD40	4
BP	GO:0048659	smooth muscle cell proliferation	1950-04-01	173/18800	0.00114675	0.00711455	0.00330799	APOE/TNF/PTEN/MYC	4
BP	GO:0031645	negative regulation of nervous system process	1950-02-01	19/18800	0.00115162	0.00711455	0.00330799	TNF/PTEN	2
BP	GO:0032930	positive regulation of superoxide anion generation	1950-02-01	19/18800	0.00115162	0.00711455	0.00330799	SOD1/CRP	2
BP	GO:0051797	regulation of hair follicle development	1950-02-01	19/18800	0.00115162	0.00711455	0.00330799	TNF/GAL	2
BP	GO:0055070	copper ion homeostasis	1950-02-01	19/18800	0.00115162	0.00711455	0.00330799	APP/XIAP	2
BP	GO:2000757	negative regulation of peptidyl-lysine acetylation	1950-02-01	19/18800	0.00115162	0.00711455	0.00330799	BRCA1/SIRT1	2
BP	GO:1901616	organic hydroxy compound catabolic process	1950-03-01	78/18800	0.00117031	0.0072144	0.00335442	APOE/PTEN/CYP3A4	3
BP	GO:0032943	mononuclear cell proliferation	1950-05-01	300/18800	0.00117832	0.00724807	0.00337007	ATM/GAL/CRP/ACE/CD40	5
BP	GO:0010948	negative regulation of cell cycle process	1950-05-01	301/18800	0.00119584	0.00731263	0.00340009	BRCA1/ATM/APC/PTEN/TREX1	5
BP	GO:0007254	JNK cascade	1950-04-01	175/18800	0.00119652	0.00731263	0.00340009	APP/TNF/EGFR/XIAP	4
BP	GO:0043534	blood vessel endothelial cell migration	1950-04-01	175/18800	0.00119652	0.00731263	0.00340009	APOE/TNF/CD40/SIRT1	4
BP	GO:0014068	positive regulation of phosphatidylinositol 3-kinase signaling	1950-03-01	79/18800	0.00121424	0.00737349	0.00342839	TNF/EGF/SIRT1	3
BP	GO:0031060	regulation of histone methylation	1950-03-01	79/18800	0.00121424	0.00737349	0.00342839	BRCA1/SIRT1/LMNA	3
BP	GO:0048145	regulation of fibroblast proliferation	1950-03-01	79/18800	0.00121424	0.00737349	0.00342839	CDK4/MYC/EGFR	3
BP	GO:0052126	movement in host environment	1950-04-01	177/18800	0.00124779	0.00756106	0.0035156	CD4/LDLR/CCR5/EGFR	4
BP	GO:0001936	regulation of endothelial cell proliferation	1950-04-01	178/18800	0.00127399	0.00757926	0.00352406	APOE/TNF/EGF/SIRT1	4
BP	GO:0009110	vitamin biosynthetic process	1950-02-01	20/18800	0.0012774	0.00757926	0.00352406	TNF/CYP3A4	2
BP	GO:0010288	response to lead ion	1950-02-01	20/18800	0.0012774	0.00757926	0.00352406	APP/PTH	2
BP	GO:0042359	vitamin D metabolic process	1950-02-01	20/18800	0.0012774	0.00757926	0.00352406	TNF/CYP3A4	2
BP	GO:0043984	histone H4-K16 acetylation	1950-02-01	20/18800	0.0012774	0.00757926	0.00352406	BRCA1/SIRT1	2
BP	GO:0045655	regulation of monocyte differentiation	1950-02-01	20/18800	0.0012774	0.00757926	0.00352406	CD4/MYC	2
BP	GO:0045821	positive regulation of glycolytic process	1950-02-01	20/18800	0.0012774	0.00757926	0.00352406	APP/MYC	2
BP	GO:1900221	regulation of amyloid-beta clearance	1950-02-01	20/18800	0.0012774	0.00757926	0.00352406	APOE/TNF	2
BP	GO:1903209	positive regulation of oxidative stress-induced cell death	1950-02-01	20/18800	0.0012774	0.00757926	0.00352406	SOD1/TNF	2
BP	GO:1903978	regulation of microglial cell activation	1950-02-01	20/18800	0.0012774	0.00757926	0.00352406	LDLR/ATM	2
BP	GO:0002443	leukocyte mediated immunity	1950-06-01	457/18800	0.00128286	0.00759581	0.00353176	TNF/C3/CRP/ACE/CD40/TREX1	6
BP	GO:0006096	glycolytic process	1950-03-01	81/18800	0.0013052	0.00768017	0.00357098	APP/MYC/TREX1	3
BP	GO:0044773	mitotic DNA damage checkpoint signaling	1950-03-01	81/18800	0.0013052	0.00768017	0.00357098	BRCA1/ATM/TREX1	3
BP	GO:0048144	fibroblast proliferation	1950-03-01	81/18800	0.0013052	0.00768017	0.00357098	CDK4/MYC/EGFR	3
BP	GO:0009266	response to temperature stimulus	1950-04-01	180/18800	0.00132755	0.0077956	0.00362466	SOD1/ATM/CD34/SIRT1	4
BP	GO:0006650	glycerophospholipid metabolic process	1950-05-01	309/18800	0.0013431	0.00787066	0.00365956	LDLR/ATM/PTEN/LCAT/CETP	5
BP	GO:0006757	ATP generation from ADP	1950-03-01	82/18800	0.00135224	0.00790795	0.00367689	APP/MYC/TREX1	3
BP	GO:0032092	positive regulation of protein binding	1950-03-01	83/18800	0.00140033	0.00813364	0.00378183	APOE/APP/ACE	3
BP	GO:0048678	response to axon injury	1950-03-01	83/18800	0.00140033	0.00813364	0.00378183	SOD1/DHFR/PTEN	3
BP	GO:0038083	peptidyl-tyrosine autophosphorylation	1950-02-01	21/18800	0.00140947	0.00813364	0.00378183	ACE/EGFR	2
BP	GO:0045717	negative regulation of fatty acid biosynthetic process	1950-02-01	21/18800	0.00140947	0.00813364	0.00378183	BRCA1/SIRT1	2
BP	GO:1903902	positive regulation of viral life cycle	1950-02-01	21/18800	0.00140947	0.00813364	0.00378183	CD4/FMR1	2
BP	GO:0008217	regulation of blood pressure	1950-04-01	183/18800	0.00141082	0.00813364	0.00378183	SOD1/TNF/ACE/CD34	4
BP	GO:0048469	cell maturation	1950-04-01	183/18800	0.00141082	0.00813364	0.00378183	APP/CFTR/BRCA2/C3	4
BP	GO:0097696	receptor signaling pathway via STAT	1950-04-01	184/18800	0.00143937	0.00828146	0.00385056	TNF/VHL/EGF/CD40	4
BP	GO:0061138	morphogenesis of a branching epithelium	1950-04-01	185/18800	0.00146832	0.008431	0.00392009	TNF/EGF/KRAS/MYC	4
BP	GO:0032945	negative regulation of mononuclear cell proliferation	1950-03-01	85/18800	0.00149972	0.00849148	0.00394821	ATM/GAL/CRP	3
BP	GO:0044774	mitotic DNA integrity checkpoint signaling	1950-03-01	85/18800	0.00149972	0.00849148	0.00394821	BRCA1/ATM/TREX1	3
BP	GO:0046889	positive regulation of lipid biosynthetic process	1950-03-01	85/18800	0.00149972	0.00849148	0.00394821	APOE/TNF/LDLR	3
BP	GO:0050886	endocrine process	1950-03-01	85/18800	0.00149972	0.00849148	0.00394821	GAL/KRAS/ACE	3
BP	GO:0071229	cellular response to acid chemical	1950-03-01	85/18800	0.00149972	0.00849148	0.00394821	TNF/MYC/EGFR	3
BP	GO:2000106	regulation of leukocyte apoptotic process	1950-03-01	85/18800	0.00149972	0.00849148	0.00394821	CCR5/PTEN/SIRT1	3
BP	GO:2000117	negative regulation of cysteine-type endopeptidase activity	1950-03-01	85/18800	0.00149972	0.00849148	0.00394821	TNF/CD44/XIAP	3
BP	GO:0015849	organic acid transport	1950-05-01	318/18800	0.00152436	0.00861382	0.0040051	APOE/TNF/GFAP/MYC/ACE	5
BP	GO:0006925	inflammatory cell apoptotic process	1950-02-01	22/18800	0.00154779	0.00862642	0.00401095	CCR5/SIRT1	2
BP	GO:0010042	response to manganese ion	1950-02-01	22/18800	0.00154779	0.00862642	0.00401095	APP/A3GALT2	2
BP	GO:0010866	regulation of triglyceride biosynthetic process	1950-02-01	22/18800	0.00154779	0.00862642	0.00401095	LDLR/C3	2
BP	GO:0010888	negative regulation of lipid storage	1950-02-01	22/18800	0.00154779	0.00862642	0.00401095	TNF/CRP	2
BP	GO:0032928	regulation of superoxide anion generation	1950-02-01	22/18800	0.00154779	0.00862642	0.00401095	SOD1/CRP	2
BP	GO:0061042	vascular wound healing	1950-02-01	22/18800	0.00154779	0.00862642	0.00401095	TNF/CD34	2
BP	GO:1903798	regulation of production of miRNAs involved in gene silencing by miRNA	1950-02-01	22/18800	0.00154779	0.00862642	0.00401095	TNF/EGFR	2
BP	GO:1900542	regulation of purine nucleotide metabolic process	1950-03-01	86/18800	0.00155104	0.00862765	0.00401153	APP/MYC/TREX1	3
BP	GO:0001667	ameboidal-type cell migration	1950-06-01	480/18800	0.00164726	0.00912827	0.0042443	APOE/TNF/EGF/PTEN/CD40/SIRT1	6
BP	GO:0051701	biological process involved in interaction with host	1950-04-01	191/18800	0.00165062	0.00912827	0.0042443	CD4/LDLR/CCR5/EGFR	4
BP	GO:0006310	DNA recombination	1950-05-01	324/18800	0.00165484	0.00912827	0.0042443	BRCA1/BRCA2/ATM/CD40/TREX1	5
BP	GO:0006140	regulation of nucleotide metabolic process	1950-03-01	88/18800	0.00165694	0.00912827	0.0042443	APP/MYC/TREX1	3
BP	GO:0007626	locomotory behavior	1950-04-01	192/18800	0.00168247	0.00912827	0.0042443	APOE/APP/SOD1/PTEN	4
BP	GO:0010952	positive regulation of peptidase activity	1950-04-01	192/18800	0.00168247	0.00912827	0.0042443	APP/TNF/MYC/SIRT1	4
BP	GO:0006833	water transport	1950-02-01	23/18800	0.00169232	0.00912827	0.0042443	MIP/CFTR	2
BP	GO:0019430	removal of superoxide radicals	1950-02-01	23/18800	0.00169232	0.00912827	0.0042443	SOD1/DHFR	2
BP	GO:0030728	ovulation	1950-02-01	23/18800	0.00169232	0.00912827	0.0042443	MYC/SIRT1	2
BP	GO:0031061	negative regulation of histone methylation	1950-02-01	23/18800	0.00169232	0.00912827	0.0042443	BRCA1/SIRT1	2
BP	GO:0045540	regulation of cholesterol biosynthetic process	1950-02-01	23/18800	0.00169232	0.00912827	0.0042443	APOE/SOD1	2
BP	GO:0048169	regulation of long-term neuronal synaptic plasticity	1950-02-01	23/18800	0.00169232	0.00912827	0.0042443	APP/KRAS	2
BP	GO:0070920	regulation of production of small RNA involved in gene silencing by RNA	1950-02-01	23/18800	0.00169232	0.00912827	0.0042443	TNF/EGFR	2
BP	GO:0106118	regulation of sterol biosynthetic process	1950-02-01	23/18800	0.00169232	0.00912827	0.0042443	APOE/SOD1	2
BP	GO:1901984	negative regulation of protein acetylation	1950-02-01	23/18800	0.00169232	0.00912827	0.0042443	BRCA1/SIRT1	2
BP	GO:1902254	negative regulation of intrinsic apoptotic signaling pathway by p53 class mediator	1950-02-01	23/18800	0.00169232	0.00912827	0.0042443	CD44/SIRT1	2
BP	GO:0001942	hair follicle development	1950-03-01	89/18800	0.00171155	0.00919716	0.00427633	TNF/GAL/EGFR	3
BP	GO:0106027	neuron projection organization	1950-03-01	89/18800	0.00171155	0.00919716	0.00427633	APOE/APP/PTEN	3
BP	GO:0016042	lipid catabolic process	1950-05-01	327/18800	0.00172308	0.00924166	0.00429702	APOE/TNF/LDLR/CDK4/CYP3A4	5
BP	GO:0046031	ADP metabolic process	1950-03-01	90/18800	0.00176727	0.00944315	0.0043907	APP/MYC/TREX1	3
BP	GO:0061097	regulation of protein tyrosine kinase activity	1950-03-01	90/18800	0.00176727	0.00944315	0.0043907	APP/EGF/ACE	3
BP	GO:0048545	response to steroid hormone	1950-05-01	330/18800	0.00179337	0.00956464	0.00444719	BRCA1/TNF/ACE/LCAT/SIRT1	5
BP	GO:0060996	dendritic spine development	1950-03-01	91/18800	0.00182412	0.00969234	0.00450657	APOE/FMR1/PTEN	3
BP	GO:0070664	negative regulation of leukocyte proliferation	1950-03-01	91/18800	0.00182412	0.00969234	0.00450657	ATM/GAL/CRP	3
BP	GO:0002082	regulation of oxidative phosphorylation	1950-02-01	24/18800	0.00184304	0.00972031	0.00451957	TNF/MYC	2
BP	GO:0002922	positive regulation of humoral immune response	1950-02-01	24/18800	0.00184304	0.00972031	0.00451957	TNF/C3	2
BP	GO:0051043	regulation of membrane protein ectodomain proteolysis	1950-02-01	24/18800	0.00184304	0.00972031	0.00451957	APOE/TNF	2
BP	GO:2000637	positive regulation of miRNA-mediated gene silencing	1950-02-01	24/18800	0.00184304	0.00972031	0.00451957	FMR1/EGFR	2
BP	GO:0032496	response to lipopolysaccharide	1950-05-01	333/18800	0.00186575	0.00982191	0.00456681	TNF/CCR5/CDK4/CD68/ACE	5
BP	GO:0019217	regulation of fatty acid metabolic process	1950-03-01	92/18800	0.0018821	0.00985334	0.00458142	BRCA1/SIRT1/TREX1	3
BP	GO:0022404	molting cycle process	1950-03-01	92/18800	0.0018821	0.00985334	0.00458142	TNF/GAL/EGFR	3
BP	GO:0022405	hair cycle process	1950-03-01	92/18800	0.0018821	0.00985334	0.00458142	TNF/GAL/EGFR	3
BP	GO:0016570	histone modification	1950-06-01	494/18800	0.00190483	0.00995405	0.00462825	BRCA1/BRCA2/ATM/FMR1/SIRT1/LMNA	6
CC	GO:0030669	clathrin-coated endocytic vesicle membrane	1950-06-01	72/19594	2.78362e-08	2.37805e-06	1.39433e-06	APOE/CD4/CFTR/LDLR/EGF/EGFR	6
CC	GO:0034358	plasma lipoprotein particle	1950-05-01	36/19594	3.12902e-08	2.37805e-06	1.39433e-06	APOE/LDLR/LPA/LCAT/CETP	5
CC	GO:1990777	lipoprotein particle	1950-05-01	36/19594	3.12902e-08	2.37805e-06	1.39433e-06	APOE/LDLR/LPA/LCAT/CETP	5
CC	GO:0032994	protein-lipid complex	1950-05-01	39/19594	4.75138e-08	2.70828e-06	1.58796e-06	APOE/LDLR/LPA/LCAT/CETP	5
CC	GO:0045334	clathrin-coated endocytic vesicle	1950-06-01	91/19594	1.14487e-07	5.2206e-06	3.06102e-06	APOE/CD4/CFTR/LDLR/EGF/EGFR	6
CC	GO:0030665	clathrin-coated vesicle membrane	1950-06-01	111/19594	3.7419e-07	1.42192e-05	8.3372e-06	APOE/CD4/CFTR/LDLR/EGF/EGFR	6
CC	GO:0030662	coated vesicle membrane	1950-06-01	176/19594	5.52179e-06	0.000179853	0.000105454	APOE/CD4/CFTR/LDLR/EGF/EGFR	6
CC	GO:0030135	coated vesicle	1950-07-01	290/19594	8.38364e-06	0.000219877	0.000128922	APOE/APP/CD4/CFTR/LDLR/EGF/EGFR	7
CC	GO:0030136	clathrin-coated vesicle	1950-06-01	192/19594	9.08993e-06	0.000219877	0.000128922	APOE/CD4/CFTR/LDLR/EGF/EGFR	6
CC	GO:0030666	endocytic vesicle membrane	1950-06-01	194/19594	9.64374e-06	0.000219877	0.000128922	APOE/CD4/CFTR/LDLR/EGF/EGFR	6
CC	GO:0034364	high-density lipoprotein particle	1950-03-01	27/19594	4.38002e-05	0.00090786	0.000532309	APOE/LCAT/CETP	3
CC	GO:0097386	glial cell projection	1950-03-01	33/19594	8.08244e-05	0.00153566	0.000900412	APP/GFAP/FMR1	3
CC	GO:0045177	apical part of cell	1950-07-01	424/19594	9.46014e-05	0.00165916	0.000972824	APP/MIP/CD44/CFTR/LDLR/PTEN/CD34	7
CC	GO:0009897	external side of plasma membrane	1950-07-01	455/19594	0.000146514	0.00238609	0.00139905	TNF/CD4/LDLR/CCR5/ACE/CD40/CD34	7
CC	GO:1990391	DNA repair complex	1950-03-01	44/19594	0.000192357	0.00292383	0.00171434	BRCA1/BRCA2/ATM	3
CC	GO:0043025	neuronal cell body	1950-07-01	482/19594	0.000208736	0.00297449	0.00174405	APOE/APP/SOD1/TNF/FMR1/GAL/CAD	7
CC	GO:0030139	endocytic vesicle	1950-06-01	342/19594	0.00022512	0.00301926	0.0017703	APOE/CD4/CFTR/LDLR/EGF/EGFR	6
CC	GO:0034362	low-density lipoprotein particle	1950-02-01	12/19594	0.000414374	0.00510315	0.00299215	APOE/LDLR	2
CC	GO:0009925	basal plasma membrane	1950-05-01	251/19594	0.000438806	0.00510315	0.00299215	CD44/LDLR/ACE/CD34/EGFR	5
CC	GO:0005769	early endosome	1950-06-01	389/19594	0.000447645	0.00510315	0.00299215	APOE/APP/CD4/CFTR/LDLR/EGFR	6
CC	GO:0000800	lateral element	1950-02-01	13/19594	0.000488916	0.00530823	0.0031124	BRCA1/BRCA2	2
CC	GO:0045178	basal part of cell	1950-05-01	269/19594	0.000601056	0.00622913	0.00365235	CD44/LDLR/ACE/CD34/EGFR	5
CC	GO:0019897	extrinsic component of plasma membrane	1950-04-01	170/19594	0.000922935	0.0091491	0.00536443	FMR1/KRAS/APC/LPA	4
MF	GO:0001618	virus receptor activity	1950-04-01	76/18410	5.34757e-05	0.00694672	0.00505101	CD4/LDLR/CCR5/EGFR	4
MF	GO:0140272	exogenous protein binding	1950-04-01	77/18410	5.62935e-05	0.00694672	0.00505101	CD4/LDLR/CCR5/EGFR	4
MF	GO:0071813	lipoprotein particle binding	1950-03-01	31/18410	8.03089e-05	0.00694672	0.00505101	APOE/LDLR/CRP	3
MF	GO:0071814	protein-lipid complex binding	1950-03-01	31/18410	8.03089e-05	0.00694672	0.00505101	APOE/LDLR/CRP	3
MF	GO:0004866	endopeptidase inhibitor activity	1950-05-01	180/18410	0.000125388	0.00864491	0.00628577	APP/NGF/C3/LPA/XIAP	5
MF	GO:0030414	peptidase inhibitor activity	1950-05-01	187/18410	0.000149912	0.00864491	0.00628577	APP/NGF/C3/LPA/XIAP	5
MF	GO:0061135	endopeptidase regulator activity	1950-05-01	194/18410	0.000177953	0.00879594	0.00639559	APP/NGF/C3/LPA/XIAP	5
