# Supplementary material for: Biomedical generative pre-trained based transformer language model for age-related disease target discovery
Source: Aging (Albany NY). 2023 Sep 22;15(18):9293–309. doi: 10.18632/aging.205055 (PMC10564439; doi:10.18632/aging.205055)
Supplement: Supplementary Table 3 [file aging-15-205055-s003.xlsx]

## Sheet: Age_related_diseases
Supplementary Table 3. Top 200 genes associated with each of 14 age-associated diseases, identified by BioGPT-G-based approach.
Alzheimer's disease	amyotrophic lateral sclerosis	chronic kidney disease	chronic obstructive pulmonary disease	cirrhosis of liver	idiopathic pulmonary fibrosis	obesity	osteoarthritis	osteoporosis	Parkinson's disease	primary myelofibrosis	pulmonary arterial hypertension	rheumatoid arthritis	type II diabetes mellitus
APP	SOD1	CFTR	CFTR	CYP2E1	TNF	NPY	CD44	PTH	LRRK2	JAK2	PAH	TNF	G6PC3
APOE	TNF	VHL	CYP3A4	CYP3A4	HGF	FTO	TNF	TNF	TH	FLT3	BMPR2	CD4	CYP3A4
BACE1	APP	ABCG2	CYP1A1	HGF	CFTR	POMC	COL2A1	LRP5	RET	BCR	PTH	CCR5	CYP2E1
NGF	GDNF	PTH	ABCG2	CFTR	SPARC	TRH	CFTR	CYP3A4	GDNF	KIT	RET	CD44	CFTR
BDNF	REST	MET	TNF	CYP2C9	FHIT	CD36	PTH	COL1A2	PINK1	RET	TNF	CD40	PPARG
GFAP	NGF	CYP3A4	CCR5	MET	MUC1	C3	FHIT	COL1A1	SNCA	MPL	ALK	CD2	FHIT
CYP3A4	GFAP	WT1	CYP2E1	ABCG2	ALK	CCK	SOD1	BMP2	PTEN	CXCR4	SRC	FHIT	RET
TTR	VHL	CCR5	ABCB1	CYP21A2	EGF	BDNF	SRC	RET	SOD1	CD34	HGF	CD5	MIP
CCR5	FUS	TNF	EGFR	CYP2A6	CD44	FHIT	SPARC	FKBP5	APP	PDGFRB	NHLH1	CRP	GK
CFTR	CNTF	EGF	MUC1	FHIT	EGFR	CRH	ABCG2	IHH	VHL	ALK	KRAS	C5	HIP1R
TNF	BDNF	RET	KRAS	TTR	MIP	PPARG	ADAMTS5	BRCA1	NGF	SET	NF1	BCR	TRH
BRCA1	CFTR	GDNF	CD4	CYP2B6	TTF1	ARC	CRP	SPARC	CYP2D6	PDGFRA	PTEN	PTH	ADA
HCN1	C3	C3	EGF	CYP2D6	CD4	RET	CCR5	SRC	BDNF	HGF	ANG	C3	CCK
SOD1	C2	AHRR	GSTM1	SRC	PTEN	SRC	APC	CD44	TAT	MYC	AHR	NGF	HGF
REST	CCR5	PCSK9	AHR	AFP	WT1	PYY	C3	BMPR2	PMP22	MET	VEGFA	CFTR	GLUL
MIP	BRCA1	ABCB1	C3	TNF	KRAS	LPL	NGF	FHIT	GFAP	STIM1	FLT3	RET	INS
TREM2	KRAS	EGFR	FHIT	ABO	BLM	TRPV1	COL1A2	CCK	TBP	CD44	PDGFRB	CD80	NPY
CD44	HCN1	HGF	AHRR	CD44	TERT	MC3R	FKBP5	VDR	HTT	CXCL12	BICD2	C2	CYP2C9
PCSK9	RET	KRAS	MIP	CCR5	TBP	TNF	IGF1	ALK	NPY	SRC	PDGFB	IL2	PCSK9
CD40	MET	CD46	CYP2J2	EGFR	VHL	ABCG2	CTSA	AHRR	CYP3A4	BRAF	FHIT	CXCR4	ABCG2
EGF	PMP22	CYP2E1	CD44	EGF	MET	PCSK9	CD4	DMP1	CNTF	WT1	EDAR	G6PC3	MET
A3GALT2	LRRK2	MIP	BRCA1	OTC	PDGFRB	GRP	COL1A1	CRP	ASNSD1	TPO	CYP2J2	CCR2	LDLR
C3	CD4	ABO	CRP	CYP1A1	RET	MYC	CYP2E1	APC	SNPH	PI3	PPARG	CYP2E1	G6PC2
APC	PTEN	ACE	SOD1	C3	AHR	CETP	OTC	EGF	A3GALT2	MUC1	VHL	MIP	C3
VHL	GHRH	DHFR	ACE2	BCL2	CCR5	HERC2	COL3A1	IGF1	TRH	KRAS	PDGFRA	EGF	EGF
ABCA1	CYP2E1	LDLR	GSTP1	TERT	AHRR	BRCA1	BRCA1	LDLR	SV2A	FHIT	TH	MUC1	VHL
CD4	C9	CD2	CYP2D6	GSTM1	BMPR2	HERC1	MIP	MET	PAH	PMS1	KIT	CD19	GRP
IAPP	TBP	CD44	HGF	VHL	CD40	G6PC3	APP	CCR5	GPI	FIP1L1	SRI	SRC	TNF
CCK	CLC	ALK	ACE	KRAS	LPA	SIRT1	COL5A1	PRL	DARS2	BMPR2	BRAF	IL6	PTH
ACHE	PINK1	G6PC3	MET	SRY	C3	CYP3A4	MET	FGF23	AHRR	PML	PGF	CRH	GIP
PTEN	GPI	CD4	APP	MIP	CXCL12	TH	FKBP10	CXCL12	COMT	EZH2	TRH	ICOS	CYP2J2
TREX1	HTT	BRCA1	ABCA1	CD4	KIT	HCN1	IHH	CFTR	AIDA	GFI1	CFTR	CD14	ABCA1
ACE2	SNCA	CLC	NGF	SPARC	SRC	PGC	PMP22	TH	REST	CBL	GDNF	DHFR	CD36
TAT	BCL2	PTEN	C5	CYP2A13	CXCR4	FAS	COL10A1	FKBP10	AANAT	G6PC3	AHRR	CCK	POMC
ACE	MIP	APOL1	ALK	GAL	KL	PTEN	LBP	APP	ASNS	BCL2	AIM2	ABCG2	IHH
ATM	C5	BCR	NHLH1	CYP2J2	PDGFRA	ABCA1	APOE	C3	MET	IDH1	REV3L	CD86	GAL
NPY	CIC	MUC1	CYP2C9	PAH	NF1	GIPR	BMP2	NHLH1	HCN1	EGFR	EGF	CCR4	APC
LRRK2	ASPM	CD80	CYP2C19	CYP1A2	REST	KCNQ1	AHRR	COL2A1	SET	FGFR1	SV2A	EDF1	KCNQ1
EGFR	GSTM1	EPO	CD40	WT1	GDNF	CYP2E1	CCK	FKBP11	BRCA1	TF	CCR5	SOD1	PTEN
E4F1	CLN3	KIT	APOE	APC	BRCA1	SCN5A	CLC	GHRH	DBH	FHL3	BPHL	APC	LPL
GAPDH	APOE	OTC	CXCL12	APOE	ACE	MET	C5	BMP4	VIP	TNF	ERBB2	FOXP3	IGF1
A4GNT	A3GALT2	SPARC	VHL	SOD1	PDGFB	AHR	HGF	NGF	IDH1	EPO	HCN4	RAG1	GLP1R
BACH1	TRH	ACE2	CYP1A2	TAT	TREX1	AHRR	MUC1	G6PC3	EPO	PTEN	BDNF	CAT	CRP
PSD	EGFR	ABCA1	APC	AHR	NGF	CRP	FKBP11	APOE	FOXO3B	CD40	ACE	TREX1	CYP1A1
LDLR	TRPV1	TERT	PTH	LDLR	PAH	CFTR	FKBP14	VHL	MIP	ERBB2	JHY	CD28	PYY
CRH	GAPDH	NLRP3	TLR4	ABCB1	PI3	BMPR2	CYP3A4	PINK1	PMS1	PDGFB	JAK2	CD22	APP
DHFR	MUS81	APC	OTC	CLC	SET	IRS1	GFAP	NF1	C3	BRIP1	CRH	VHL	ABCB1
ABCB1	G6PC3	MYC	PAH	MUC1	FOXO3B	FABP2	DMP1	PMP22	CAT	ASPM	NFAT5	CYP2C9	IDH1
GAL	BRCA2	SET	CD14	CYP2C19	FOXO3	LDLR	DHFR	HGF	PTH	TERT	GHRH	CD34	BRCA2
CYP2E1	S100B	LRRK2	BCR	CRP	SOD1	HGF	COL11A1	PTEN	BCL2	ATM	TPR	CYP3A4	HLTF
VIP	F7	FHIT	C2	AGT	COL1A2	NGF	EGFR	MYC	DARS1	VHL	LPA	EGFR	HLX
CYP2D6	CYP3A4	CD34	SRC	CYP3A5	FIG4	HIP1R	VHL	GC	TTR	CCR5	PDGFA	ALK	BDNF
PI3	TTR	SRC	BRCA2	CAT	FOXP3	GHSR	ALK	CXCR4	TNF	STAT3	CYP1A1	GPI	CD34
TRH	SCN5A	GSTM1	CLC	SV2A	C5	ASNS	NLRP3	DHFR	CYP1A1	GATA1	BTRC	HLX	NGF
GPI	ALK	CYP2C9	HLX	GSTP1	COL3A1	LEP	CD68	MIP	BRI3	ERBB3	WT1	GHRH	BRCA1
RET	GAL	FLT3	PCSK9	GFAP	CXCR3	SV2A	MMP9	PPARG	PML	PMS2	MIP	APP	AAMP
PTH	ETHE1	APOE	NLRP3	BRCA1	BRAF	APC	FGF2	HIP1R	UCHL1	PUM1	JUND	MIF	FOXO3B
HTT	IDH1	TTR	CYP2A13	DHFR	HMGB1	HERC5	CAT	CRH	PSD	CD4	ACE2	IFNAR1	CLC
MET	BCR	PAH	RET	LCAT	GSTM1	PRL	C2	PRAMEF3	PGC	STIL	CD4	CD68	GIT1
CRP	NF1	CRP	CXCR4	ACE	ACE2	NHLH1	EGF	PRAMEF16	MITF	FHL5	SRY	IHH	TAT
CXCR4	SCN8A	LCAT	CD2	AIM2	COL1A1	KIT	COL4A1	PRR25	ATM	BTRC	PI3	CXCR3	CRH
FHIT	EML4	AGT	ERBB2	HP	EDF1	CCR5	BMPR2	PYDC5	CD4	MITF	CYP3A4	CCR6	CD4
BRI3	JHY	FGF23	CYP2A6	MYC	HCN1	CNTF	CXCL12	RBMY1C	PI3	FH	EDARADD	ADA	TTR
ABCA7	AHSP	CIC	BDNF	CBS	GRP	FABP4	TRPV1	SDIM1	GAPDH	F5	MLPH	BRCA1	PI3
TBP	SCN9A	CD59	DHFR	ABCA1	CD34	GHRH	CD2	SIK1B	DHFR	STIM2	RESP18	TRH	APOE
KRAS	KIF5A	APP	TRPV1	RET	EDA	AAMP	PTEN	SLC4A7OS	ATP1A3	VWF	NPY	CD226	SIRT1
BRCA2	PML	NGF	PI3	BCR	TLR4	HLTF	COL9A2	C14orf16	ABCG2	FOXO3B	HLX	AHRR	ATM
LPA	BACH1	CYP2J2	KCNH2	TP53	ASCL1	APOE	COL7A1	PPARAL	TRPA1	CD33	BIK	STAT4	C2
CD34	BICD2	CD40	CD34	APP	CLC	HCFC1	HMGB1	SMIM11B	HGF	NOTCH1	TRPC1	JHY	AGT
PMP22	VIP	CYP1A1	HP	SBK1	BTRC	PTH	KRAS	SMIM34B	SKI	MUTYH	ERBB3	C21orf86	CDKN2A
AADAT	CXCR4	ATM	HCN1	ALK	CYP2E1	IHH	EDF1	SPHAR	EPHX1	BTK	KCNH2	CBSL	HERC1
ADA	BIK	ASPM	CAT	PTH	IREB2	ABCB1	FKBP6	TAS2R33	DAO	EGF	EGFR	C21orf79	MUC1
BCL2	ACE2	CCR2	CD5	CD34	GFAP	FOXO3B	AIM2	TAS2R36	CXCR4	DNMT3A	FOXO3B	C21orf114	GIPR
CLC	EMP2	CD22	PTEN	BPHL	TTK	DDT	CYP2C9	TAS2R45	AIMP2	MIP	SRF	C16orf43	CYP2A6
SV2A	TREX1	CXCR4	CYP1B1	PHB	HLTF	C5	CD40	TGFBRE	APOE	GDNF	MET	CCL4L1	AIM2
A2M	ACE	CTSA	PPARG	ATP7A	TGM1	SRY	G6PC3	TMEM137	PDC	MST1R	F5	C21orf32	INSR
ABCA4	TREM2	CYP2D6	CXCR2	SET	SRY	BRAF	BACH1	SMCR9	CCR5	EML4	HCN1	CLDN11CL	PMP22
NPS	ATP1A3	BRCA2	CCK	CYP3A7	COL7A1	HCN3	PINK1	PIK3R1OS	ASPM	PMF1	FHL5	C21orf72	INKA1
KCNH2	BRIP1	SOD1	G6PC3	PCSK9	NLRP3	VHL	CXCR4	C1orf193	CD34	CD19	CXCR4	C17orf11	DMPK
CR1	EGF	C5	FLT3	CYP2S1	ERBB2	GC	COL9A1	TRA	SCN5A	JHY	CD34	C20orf66	TH
AIMP2	SCN4A	FH	LCAT	CIC	CIC	PI3	AHSG	LENG11	MANF	NF1	CXCL12	C19orf31	GDNF
ALK	HGF	CCR4	GRP	NOTCH1	PDGFA	EGF	FKBP8	LILRA3	APC	AHRR	STIM1	C19orf8	CETP
HIVEP2	GRP	AIM2	MYC	CCK	FOXC2	GIP	LDLR	LUZP6	NQO1	MLH3	EPO	C18orf61	CYP2D6
IDH1	OTC	AMH	PMP22	G6PC3	APC	IGF1	ACE	M195	BCR	CCR4	TRPC6	C18orf41	DPP4
AIDA	BMPR2	ATR	CRH	IHH	HTT	HLX	BCR	MELL1	D2HGDH	MSH4	BCR	C17orf84	ERBB2
GDNF	CAT	ADA	BCL2	F2	BICD2	GIT1	MMP2	MSNL2	DDT	TFG	PMP22	CRYAA2	CDK4
COMT	PTH	TRPV1	AIM2	C5	BPHL	SCN8A	CD34	MUC3B	C2	ABCG2	NR2E3	COLOT1	TCF4
CAD	TP53	HCN1	BMPR2	PCNA	GPI	SBK1	CTH	C3orf53	RGS4	MLPH	TTF1	C20orf109	GHRH
S100B	TH	IGF1	CYP2B6	HLX	MITF	BRI3	LRP5	C1orf197	CYP2E1	MCFD2	BMPER	DDX7	OGT
TP53	ANG	BCL2	CYP3A5	HCN1	ATM	APP	GAPDH	MUC8	HDAC6	IRAK4	JRKL	DEFA8	MITF
CTH	COL7A1	PML	ERBB3	CETP	HLX	VGF	ATP7A	OCLM	PC	CD5	TTK	C15orf31	PGC
LCAT	DHFR	ATP7A	HCN2	PEMT	CCL2	GCGR	FKBP15	OR8U8	EDF1	STIP1	BMPR1A	GAGE4	SRC
PML	ATM	VEGFA	EPO	SBF1	RESP18	CYP1A1	REST	OR8U9	DTX1	ASMT	CYP1B1	GAGE2D	OTC
JHY	FOXO3B	NF1	ATM	CTH	CD2	CYP2J2	TLR4	OR9G9	SCN8A	CBFB	TPO	GAGE2C	IRS1
RAN	NF2	PCNA	LPA	F5	SBF1	ERBB2	HIP1R	PCDHA@	AIM2	CD59	GNB3	GAGE2B	HERC2
EPHX1	KCNH2	CD24	CBS	CD46	CXCR2	CD2	AHSP	PCDHB@	G6PC3	MLIP	HIF1A	FOLR2L	SURF1
PINK1	GFI1	GAL	VIP	COL7A1	NHLH1	FOXP2	ABCB1	PCDHG@	GAL	HOXA9	TRPC4	FLYWCH1L1	INKA2
AAMP	BACE1	HLTF	FOXO3	CDA	ETHE1	PPARGC1A	PPARG	TMEM155	AHSP	CD47	CD40	FAM243B	C5
NF2	E4F1	AHR	SCN5A	COL1A2	FKBP5	SF1	GDNF	C1orf136	A4GNT	GHR	BICD1	FAM231C	IREB2
HIVEP1	IGF1	PI3	LDLR	CD40	IFNAR1	TF	LCAT	LENG6	ABCB1	BRCA2	BRIP1	FAM41BY	HCN1
CD68	CD44	TP53	CIC	HLTF	APP	ACE	PCSK9	TRB	LDLR	NHLH1	TRPC5	FAM22C	ATP7A
ABO	DARS2	CD5	ABO	SRI	ABCG2	TBP	BRAF	ZNF196	DPH1	MCPH1	PMS1	EEF1A1L14	GPI
C9	CD40	BMPR2	AGT	PTEN	CYP3A4	BTRC	IL6	ZNF199	BRIP1	ABO	TRPC3	DUX5	CCR5
PSAP	NPY	HLX	TERT	ACE2	AIM2	JAK2	RET	ZNF240	BACH1	HCN1	GCA	DUX3	CD86
BRAF	ASNS	SCN5A	ASCL1	SMAD4	MIF	CYP2C9	COMT	ZNF241	KIF5A	EMP1	NR0B1	DUX1	ACE
AIM2	SV2A	DBP	REST	CD59	CYP2J2	FSHR	COL27A1	BAGE3	AHDC1	ERBB4	VENTX	C15orf49	GCGR
A4GALT	TERT	TLR4	COMT	PML	SRF	UHRF1	AMH	ZNF242	APAF1	CCN1	BCL2	ATXN8	DHFR
MAG	SNPH	VWF	CD36	WWOX	TH	NR0B1	TTR	ZNF244	BMPR2	GFAP	SBK1	C14orf184	FOXO1
CYP1A1	APC	IHH	PML	BACH1	SMAD4	BRCA2	BCL2	ZNF245	CLC	BCOR	REST	C6orf215	FOXP3
SET	HDAC6	BRIP1	EDF1	F3	CCN2	FOXO1	ADAMTS13	ZNF246	ERBB2	CIC	CNP	C6orf50	IAPP
CNTF	BRI3	DMD	SPARC	DBP	CD68	ATM	KL	ZNF247	A4GALT	MAF	VWF	C6orf36	PYCR1
C5	AHRR	AURKB	CD80	SBDS	PML	ATP7A	COL4A3	ZNF249	PHB	SRY	VEGFC	C5orf9	ABO
BRIP1	BRAF	CYP2A6	CYP21A2	S100B	CYP1A1	AGT	ATM	ZNF301	GFI1	STAT5A	ABCG2	C3orf53	PPARGC1A
AIRE	WT1	PROK2	KIT	BRCA2	PCNA	CLC	GHRH	ZNF522	FOXP2	FLVCR2	SKI	C1orf197	FOXP2
SAA1	CCK	NHLH1	CCR2	AMH	RPE	FGF21	AGT	BAGE	TRPV1	AURKB	STAT4	C1orf193	PAH
AIPL1	AUH	C2	CXCR3	KIT	CX3CR1	ADA	FUS	ZNF705F	BPHL	SHH	EPHX1	C1orf136	GFAP
GSTM1	SUMO1	FSHR	TBP	BMPR2	BRIP1	CYP2A13	HIRA	ATXN8	OTC	AUH	EDC3	C1orf20	FOXO3
ASCL1	LBP	TREX1	ETHE1	C9	ABCA1	EGFR	EMB	APOBEC3A_B	PROX1	SF3B1	GC	C1orf5	PPARD
IHH	MUSK	VDR	TP53	EDA	CCR2	GDNF	ADAMTS4	ZNF194	PTCH1	IL6	G6PC3	BAGE5	LCAT
TH	SCN1A	HCK	NPY	F8	C2	MIP	ADAMTS8	ZNF188	KIT	SBF1	APC	BAGE4	SCN5A
G6PC3	SBDS	GPI	TRH	CD2	STAT4	C2	GSTM1	ZNF182L	OLIG2	HLTF	REL	BAGE3	HERC5
HIVEP3	MYC	CD33	HMGB1	FH	PTH	BRIP1	CAD	XRCC6BP2	IHH	BRCA1	REN	BAGE	GC
C2	MUC1	CKS1B	WT1	IFNAR1	TF	OLIG2	GDF6	C1orf20	PLD2	FOXM1	PKHD1	GAGE6	MYC
MUC1	NOTCH1	BRAF	FOXP3	HGSNAT	BIK	URGCP	AHSA1	C1orf5	KCNH2	IRF8	ETHE1	APOBEC3A_B	HIP1
NLRP3	SRC	BMP2	PCNA	VWF	FHL5	G6PC2	VWF	TRD	CD40	DFFA	EHBP1	C6orf202	HIPK2
GSTP1	C7	EBP	CETP	TBP	SART1	PPARD	MIF	TRG	DAXX	BICD2	MLH3	C8orf6	BMPR2
CFH	TRPA1	CDKN2A	CCR4	CP	GFI1	AIM2	IDH1	U2AF1L5	PIN1	AIMP1	AIMP1	C14orf157	EGFR
AANAT	EMB	BDNF	CD38	PROX1	BCR	FGFR1	GHSR	UGT1A	AURKB	MLKL	SNPH	C8orf15	A3GALT2
AGT	AIM2	INKA1	KCNQ1	CD19	SBK1	SBF1	ICE2	BAGE5	EYS	GATA2	GNAS	C14orf136	ETHE1
EPHA1	FH	FIG4	SBK1	SV2B	CNTF	NLRP3	BACE1	ZNF1	NPS	CCN3	GIT1	C14orf113	FIGLA
PC	SET	PKHD1	CNTF	AHRR	MMP2	ATP1A3	TP53	ZNF172	ALK	ASNS	SET	C14orf65	CD2
CCR4	STIM1	TBP	SBF1	EBP	ERBB3	TG	OPTN	ZNF43L	GC	DMPK	MYC	C14orf57	ERBB3
DARS2	UCHL1	DPP4	ICE1	BRI3	FKBP10	PAM	SAA1	BAGE4	DOHH	FUS	CXCR2	C14orf40	KIT
CAT	TAT	CD47	IGF1	IREB2	BARD1	SKI	ABCA1	ZNF116	FUS	MUSK	GCNA	C14orf16	CYP2A13
ATP1A3	RAN	GAPDH	BRAF	COMT	LRRK2	CIC	SBF1	ZNF125	GHRH	CXCR2	VIP	C14orf7	FTO
HGF	THAP1	AR	KL	C2	DFFA	F5	ADAMTS10	ZNF126	ETHE1	FOXO1	SMAD4	C13orf41	CYP21A2
SIRT1	TRPS1	PROP1	GFAP	LPA	ANG	CYP2D6	LOX	ZNF164	AIF1	CD2	PVR	C11orf26	GSTM1
SPARC	AIFM1	MDM2	VEGFA	FIG4	TRH	CYP2A6	FH	ZNF171	FLT3	CDK4	TGM1	C9orf149	ACE2
CPE	EPO	CYP3A5	LPL	CD5	COL4A3	CD40	COL17A1	LENG10	SRC	MCL1	SV2B	C9orf63	PCNA
NOTCH3	HMGB1	CD38	SET	CAD	JHY	KCNH2	CDK4	KIR2DS3	BRCA2	NRAS	NOTCH1	C9orf56	EPO
BICD2	RAG1	PIK3CA	BPHL	TF	FLT3	SURF1	MYC	KIR2DS5	GSTP1	GPI	HLTF	C9orf38	CYP1A2
MANF	MBP	CD55	CYP3A7	PPARG	EPO	GPC3	TREX1	C20orf109	FH	ERG	PTK7	C9orf33	TCF7L2
SRI	BAX	CYP1A2	CYBB	ETHE1	IDH1	MIF	FKBP7	C9orf63	BACE1	CCN4	FGF23	C8orf16	CYP2C19
CD36	HCN4	IL2	TREX1	FAS	HP	GIPC1	COL22A1	C9orf56	ABO	CD99	JDP2	GAGE5	PC
NOTCH1	RELN	JHY	ATP7A	AHCY	CD36	MITF	BRCA2	C9orf38	A2M	LPA	NGF	GTF2H2C_2	NPS
DDT	FHL3	GSTP1	FOXP2	BICD2	FOXC1	SCN2A	SIRT1	C21orf32	SIRT1	IREB2	TTN	GAGE7	PEMT
ATR	EMP1	CYP2B6	CAD	APOL1	IHH	FH	NOTCH1	C21orf72	PTK7	HGSNAT	GRP	TMEM137	PRL
PACS1	CCR4	ANG	CD68	TLR4	PINK1	TCF4	FHOD1	C21orf79	THAP1	JUND	SPARC	ZNF1	CAD
AIFM1	MDM2	ATP1B1	FKBP11	SART1	CCN1	LPA	TAT	C21orf86	RAN	PF4	TBP	XRCC6BP2	SHBG
CCR2	CS	JDP2	ABCA3	F9	AGT	SCN4A	BDNF	C21orf114	ACHE	BARD1	BMP4	UGT1A	GHSR
MTHFR	EDF1	PINK1	TH	ANG	BDNF	HIP1	CD5	CBSL	EGFR	DTX1	BRCA1	U2AF1L5	TBP
JDP2	LPA	HP	EBP	ADM	NKG7	NPY2R	F9	CCL4L1	TREX1	PDGFA	IRAK4	TRG	KRAS
HERC2	SORL1	CXCL12	GDNF	BRAF	PKHD1	ALK	COL4A2	CLDN11CL	E2F1	ASXL1	FHL3	TRD	CYP2B6
SNCA	HIVEP2	CDK2	FKBP5	IGF1	CCR4	GLUL	CS	COLOT1	TF	CFTR	CAT	GAGE8	EMP2
CETP	LDLR	SBK1	ATR	PI3	IGF1	FABP5	TERT	CRYAA2	LPA	PTH	KL	TRA	BRI3
TCF4	ABCG2	CD19	MPO	ASCL1	FAP	CD4	IVD	DDX7	DSP	MUS81	AGT	TMEM155	FIG4
HERC1	FREM1	DDT	MMP9	SAMHD1	HCFC1	GNB3	PCNA	DEFA8	TRPC1	CXCR3	HP	TGFBRE	ERBB4
CBS	F5	PMP22	LRRK2	PINK1	TTN	BHMT2	CXCR2	DUX1	NF1	MN1	FGFR1	RBMY1C	PRIM1
GHRH	CYP2D6	AHDC1	GC	BARD1	DPP4	CCR2	CNTF	DUX3	E4F1	STAT5B	EDF1	TAS2R45	NHLH1
GC	ACHE	IREB2	MBP	CD22	HCN2	AR	WT1	C9orf149	PROP1	GPIHBP1	RGS4	TAS2R36	ARC
CTCF	ABCA1	LPA	EMB	PROS1	PPARG	JDP2	TBP	C20orf66	TP53	NFX1	HCN2	TAS2R33	GPC3
OTC	FIG4	HTT	SRI	GAPDH	EBP	INS	BMP4	C14orf40	IAPP	CFH	AIDA	SPHAR	CDKN2B
ATP7A	HGSNAT	BTRC	FKBP10	NHLH1	CD80	AVP	FHL3	C19orf31	CCK	PRL	EDA2R	SMIM34B	PDC
APOB	PROX1	CDK4	CX3CR1	MDM2	FGF23	GLP1R	HIVEP2	C14orf57	PTPRH	F8	TRANK1	SMIM11B	PMS1
CTSA	OLIG2	COMT	ADA	TH	C9	AHI1	OARD1	C14orf7	SCN2A	MSMB	PPARGC1A	SMCR9	JDP2
LPL	DMPK	CYP21A2	FH	ATM	EMB	MAX	VEGFA	C14orf65	TRPS1	NLRP3	FKBP10	SLC4A7OS	DDT
NF1	PI3	MTHFR	PGF	LFNG	PMP22	ERBB3	HTT	C14orf113	EGF	HIP1R	DHFR	SIK1B	SOD1
FAS	SURF1	E2F1	CD86	EMB	APOE	VIP	COL6A1	C14orf136	AIPL1	SKI	SBF1	ZNF43L	ASNS
PCNA	ASCL1	ATP1A3	CBR3	PROP1	TTR	GAL	GPI	C14orf157	ICOS	BCAT1	GFI1	ZNF116	ABCC6
SBF1	GHSR	CYP2A13	BTRC	LBP	JAK2	DBP	FAIM2	C14orf184	AR	FHOD1	EMB	ZNF125	SPARC
SCN5A	AIF1	CKB	HLCS	CXCL12	IRF5	BLID	FIG4	C15orf31	CYP1A2	FEM1B	CIC	ZNF126	RPE
RPE	PAH	A3GALT2	IL6	BLM	CAT	CYP1A2	PIK3CA	C15orf49	PCNA	EDF1	BMPR1B	ZNF705F	LAT
PAH	CD34	EPHX1	NOTCH1	BDNF	KCNH2	LAT	NF1	C16orf43	PTK2B	CD74	GRHL3	ZNF522	CYP2S1
HP	SART1	F9	BACH1	FOXO3B	FKBP11	HCN2	SART1	C13orf41	PPARG	AIM2	FKBP11	ZNF301	BACH1
NHLH1	MAG	BARD1	STAT4	PRL	INKA1	MAOA	COL8A1	C17orf11	AIFM1	CX3CR1	GATA4	ZNF249	JHY
PSAPL1	ASNSD1	DCC	FOXO3B	RPE	SRI	HTT	ADAMTS3	C11orf26	GCNA	PMP22	PRL	ZNF247	HP
HDAC6	GC	HGSNAT	ABCA4	MIF	JUND	SCN9A	GSTP1	C17orf84	AHSG	EMP2	TTYH1	ZNF246	SV2A
SRC	EMX1	TH	AR	COL1A1	COL4A5	HP	ICE1	C18orf41	JHY	CD22	EVL	ZNF245	LEP
HERC5	GEN1	REST	CYP2S1	ALB	ATR	CTSA	MIA	C18orf61	REN	EBP	C5	ZNF244	AHR
E2F1	OPTN	CCR3	TTR	ADA	CD14	MORC1	AHR	C19orf8	RELN	CBX5	CCR4	ZNF242	INSL3
MDM2	FKBP10	SNRK	ABCC6	HMGB1	STAT6	F2	CD36	C9orf33	BIK	HCK	HTT	ZNF241	TRPV1
SNPH	MITF	GHR	ERBB4	TTK	BLID	HERC4	SRY	DUX5	AHR	FANCA	SMAD3	ZNF240	FABP2
SART1	CDKN2A	PPARG	PC	DDT	F5	CYP21A2	SRI	EEF1A1L14	OPTN	NF2	FOXC2	ZNF199	FABP4
AHDC1	HIVEP1	GNPTAB	PROX1	HIVEP2	CD5	GCNA	SLIT2	FAM22C	EPHA1	THYN1	FKBP5	ZNF196	LENG11
CD38	SARM1	NKG7	BICD2	ICE2	TPO	FOXO3	WWOX	GPR130	JDP2	NFAT5	UHRF1	ZNF194	LENG10
AR	CTH	CETP	GHSR	USE1	TP53	STAT3	CFH	C6orf202	GSTM1	KL	BRCA2	ZNF188	LILRA3
NFIA	UHRF1	AVP	CCR3	NF1	VEGFA	CYP2C19	HCFC1	C6orf50	ERBB4	MPO	JSRP1	ZNF182L	C6orf36
PAM	SLIT2	PKD1	MGMT	SIRT1	GSTP1	SIRT6	KCNH2	GTA	AHI1	ICMT	CYP2D6	ZNF172	LUZP6
GRP	ATP7A	INKA2	PINK1	BRIP1	ATP7A	IDH1	FKBP1A	GTF2H2C_2	MIF	MSTO1	AMH	ZNF171	C5orf9
SBK1	COMT	CAD	CTSA	CD80	INKA2	ETHE1	HIVEP1	GVQW1	ASCL1	MLLT3	PGC	ZNF164	C6orf50
DMPK	ABCB1	CYP2C19	HLTF	TRH	CDKN2A	PMS1	AR	HSPA3	PMS2	CD177	HCFC1	SDIM1	C18orf61
AHSP	EFHC1	CD86	F2	ERBB2	PTK7	ERBB4	BRI3	IGH	MUS81	VEGFA	BAGE3	TRB	C6orf202
CS	DMD	JAK2	CBL	FIBIN	FGFR1	SBDS	STAR	C6orf36	PRL	WBP2NL	C11orf26	PYDC5	LENG6
HCN2	LIF	FOXO3B	GPI	JAK2	CDKN2B	TAT	HDAC6	IGK	BARD1	HCST	C9orf149	LENG10	KIR2DS5
HCN4	MIA	PNP	ANG	HCST	CD28	CD44	SBK1	IGL	PCSK9	NKG7	C9orf63	KIR2DS5	C1orf197
DFFA	GJA1	PRL	TTK	WWTR1	ICE2	MOBP	CTSH	KCNE1B	MYC	FOXP1	C13orf41	KIR2DS3	KIR2DS3
MBP	DAP	MIF	MDM2	CYP2W1	HCN4	JHY	COL11A2	KIAA0754	ACE2	NOTCH2	APOBEC3A_B	KIR2DS2	KIR2DS2
PPARG	NEIL1	CDKN2B	SV2A	ATP7B	MMP9	GFAP	HLX	KIR2DL2	RPE	FAIM	ATXN8	KIR2DL5B	C6orf215
SCN8A	FKBP5	DMPK	NF1	DMPK	BNIP3	CA2	MDM2	C5orf9	MORC1	PMFBP1	C14orf65	KIR2DL2	C8orf6
AIF1	PMS1	CXCR2	GHRH	GDNF	BRCA2	BCL2	CCR2	KIR2DL5B	IDS	STAT1	C9orf56	KIAA0754	C8orf15
